# Supplementary material for: The Identification of Several Dipterocarpaceae and Fagaceae Trees by Barcode DNA Coupled with High-Resolution Melting Analysis
Source: MDPI journal article supplement (doi:10.3390/f12111466), 2021-10-27

**Supplementary Data A.** Dipterocarpaceae sequences of *matK*, *rbcL*, *trnL* and ITS were retrieved from GenBank (NCBI) with accession number.

| Species                        | Accession number |             |             |             |
|--------------------------------|------------------|-------------|-------------|-------------|
|                                | ITS              | <i>matK</i> | <i>rbcL</i> | <i>trnL</i> |
| <i>Anisoptera costata</i>      | -                | MG910368    | MG895946    | KP995496    |
|                                | -                | KJ708821    | AB925371    | DQ157291    |
|                                | -                | AB924760    | AB925341    | MN445042    |
|                                | -                | AB924730    | KJ594581    | MN445040    |
|                                | -                | -           | MN445005    | -           |
|                                | -                | -           | MN445002    | -           |
|                                | -                | -           | MN444962    | -           |
| <i>Anisoptera grossivenia</i>  | -                | KY972899    | KY973096    | KY972702    |
|                                | -                | KY972898    | KY973095    | KY972701    |
| <i>Anisoptera laevis</i>       | -                | AB006370    | KJ594583    | AB006387    |
|                                | -                | KY972901    | KJ594582    | KY972704    |
|                                | -                | KY972900    | KY973098    | KY972703    |
|                                | -                | -           | KY973097    | AB451993    |
|                                | -                | -           | -           | KP995497    |
|                                | -                | -           | -           | AB006404    |
|                                | -                | -           | -           | AB452201    |
| <i>Anisoptera marginata</i>    | -                | KY972903    | Y15144      | KY972706    |
|                                | -                | KY972902    | KY973100    | KY972705    |
|                                | -                | AJ581409    | KY973099    | -           |
| <i>Anisoptera megistocarpa</i> | -                | KJ708823    | KJ594586    | -           |
|                                | -                | KJ708822    | KJ594585    | -           |
|                                | -                | -           | KJ594584    | -           |
| <i>Anisoptera oblonga</i>      | -                | AB006371    | -           | AB006388    |
|                                | -                | AB006405    | -           | AB006405    |
|                                | -                | AB006388    | -           | -           |
| <i>Anisoptera scaphula</i>     | -                | -           | -           | KP995498    |
| <i>Balanocarpus heimii</i>     | -                | -           | EF660052    | -           |
|                                | -                | -           | NC_041191   | -           |
|                                | -                | -           | MH746730    | -           |
|                                | -                | -           | DQ157293    | -           |

**Supplementary Data A. (cont.)** Dipterocarpaceae sequences of *matK*, *rbcL*, *trnL* and ITS were retrieved from GenBank (NCBI) with accession number.

| Species                           | Accession number |             |             |             |
|-----------------------------------|------------------|-------------|-------------|-------------|
|                                   | ITS              | <i>matK</i> | <i>rbcL</i> | <i>trnL</i> |
| <i>Cistus laurifolius</i>         | -                | KY972910    | -           | -           |
|                                   | -                | DQ093005    | -           | -           |
|                                   | -                | DQ093004    | -           | -           |
| <i>Cotylelobium burckii</i>       | -                | KY972911    | KY973108    | KY972713    |
| <i>Cotylelobium lanceolatum</i>   | AY026696         | -           | -           | AB452013    |
|                                   | AY026639         | -           | -           | KP995499    |
|                                   | -                | -           | -           | AB452221    |
|                                   | -                | -           | -           | AY026582    |
| <i>Cotylelobium malayanum</i>     | -                | AB006372    | -           | AB006389    |
|                                   | -                | AB246414    | -           | AB006406    |
|                                   | -                | -           | -           | AB246544    |
|                                   | -                | -           | -           | AB246479    |
| <i>Cotylelobium scabriusculum</i> | -                | AB246415    | -           | AB246545    |
|                                   | -                | -           | -           | AB246480    |
| <i>Dipterocarpus alatus</i>       | -                | KY972914    | AB925589    | KY972716    |
|                                   | -                | AB246473    | KY973111    | AB246603    |
|                                   | -                | AB924964    | DQ157299    | AB246538    |
|                                   | -                | KC568463    | -           | DQ157280    |
|                                   | -                | KC568464    | -           | -           |
|                                   | -                | KC568465    | -           | -           |
|                                   | -                | KC568466    | -           | -           |
|                                   | -                | KC568467    | -           | -           |
|                                   | -                | KC568468    | -           | -           |
|                                   | -                | KC568469    | -           | -           |
|                                   | -                | KC568470    | -           | -           |
|                                   | -                | KC568471    | -           | -           |
|                                   | -                | KC568472    | -           | -           |
|                                   | -                | KC568473    | -           | -           |

**Supplementary Data A. (cont.)** Dipterocarpaceae sequences of *matK*, *rbcL*, *trnL* and ITS were retrieved from GenBank (NCBI) with accession number.

|                                  |                            |                                                                      |                                |                                              |
|----------------------------------|----------------------------|----------------------------------------------------------------------|--------------------------------|----------------------------------------------|
| <i>Dipterocarpus baudii</i>      | -<br>-<br>-                | AB006376<br>KF021566<br>-                                            | -<br>-<br>-                    | AB006393<br>KP995500<br>AB006410             |
| <i>Dipterocarpus borneensis</i>  | -<br>-                     | KY972915<br>KY972916                                                 | KY973113<br>KY973112           | KY972718<br>KY972717                         |
| <i>Dipterocarpus caudatus</i>    | -<br>-                     | KJ708904<br>MF418855                                                 | KJ594683<br>-                  | -<br>-                                       |
| <i>Dipterocarpus caudiferus</i>  | -<br>-<br>-                | KY972924<br>KY972923<br>MF418857                                     | KY973121<br>KY973120<br>-      | KY972726<br>KY972725<br>-                    |
| <i>Dipterocarpus chartaceus</i>  | -<br>-                     | -<br>-                                                               | -<br>-                         | KP995501<br>DQ157282                         |
| <i>Dipterocarpus condorensis</i> | -<br>-<br>-<br>-<br>-<br>- | KJ611229<br>KC765152<br>KC765151<br>KC765144<br>KC765143<br>KC765142 | -<br>-<br>-<br>-<br>-<br>-     | -<br>-<br>-<br>-<br>-<br>-                   |
| <i>Dipterocarpus confertus</i>   | -<br>-<br>-<br>-           | KY972920<br>KY972919<br>-<br>-                                       | KY973117<br>KY973116<br>-<br>- | KY972722<br>KY972721<br>AY026528<br>AY026583 |
| <i>Dipterocarpus cornutus</i>    | -<br>-<br>-                | KJ708905<br>AB246472<br>-                                            | -<br>-<br>-                    | AB246602<br>KP995502<br>AB246537             |

**Supplementary Data A. (cont.)** Dipterocarpaceae sequences of *matK*, *rbcL*, *trnL* and ITS were retrieved from GenBank (NCBI) with accession number.

|                                   |   |          |          |          |
|-----------------------------------|---|----------|----------|----------|
| <i>Dipterocarpus costatus</i>     | - | KJ611241 | KM267152 | DQ157281 |
|                                   | - | KC708341 | MH113366 | -        |
|                                   | - | KC708340 | AB925524 | -        |
|                                   | - | KC708339 | AB925489 | -        |
|                                   | - | KC708338 | AB925384 | -        |
|                                   | - | KC708337 | DQ157300 | -        |
|                                   | - | AB924773 | -        | -        |
|                                   | - | AB924903 | -        | -        |
| <i>Dipterocarpus costulatus</i>   | - | -        | -        | KP995503 |
| <i>Dipterocarpus crinitus</i>     | - | -        | -        | KP995504 |
| <i>Dipterocarpus dyeri</i>        | - | KJ611231 | KM267151 | DQ157283 |
|                                   | - | KC765147 | DQ157302 | -        |
|                                   | - | KC765146 | -        | -        |
|                                   | - | KC765145 | -        | -        |
| <i>Dipterocarpus elongatus</i>    | - | -        | -        | KP995505 |
| <i>Dipterocarpus fagineus</i>     | - | -        | -        | KP995506 |
| <i>Dipterocarpus glandulosus</i>  | - | AB246477 | -        | AB246542 |
|                                   | - | -        | -        | AB246607 |
| <i>Dipterocarpus grandiflorus</i> | - | -        | -        | KP995507 |
| <i>Dipterocarpus hasseltii</i>    | - | -        | -        | KP995508 |
| <i>Dipterocarpus hispidus</i>     | - | AB246476 | -        | AB246606 |
|                                   | - | -        | -        | AB246541 |
| <i>Dipterocarpus insignis</i>     | - | AB246475 | -        | AB246605 |
|                                   | - | -        | -        | AB246540 |
| <i>Dipterocarpus intricatus</i>   | - | AB924851 | KM267150 | DQ157284 |
|                                   | - | AB924855 | AB925469 | -        |
|                                   | - | AB924744 | AB925465 | -        |
|                                   | - | AB924833 | AB925445 | -        |
|                                   | - | KC765148 | AB925356 | -        |
|                                   | - | KC765149 | -        | -        |
|                                   | - | KJ611230 | -        | -        |

**Supplementary Data A. (cont.)** Dipterocarpaceae sequences of *matK*, *rbcL*, *trnL* and ITS were retrieved from GenBank (NCBI) with accession number.

|                                    |                                           |                                                                                                          |                                                                                     |                                                                                     |
|------------------------------------|-------------------------------------------|----------------------------------------------------------------------------------------------------------|-------------------------------------------------------------------------------------|-------------------------------------------------------------------------------------|
| <i>Dipterocarpus kerrii</i>        | -<br>-<br>-                               | AB006375<br>-<br>-                                                                                       | -<br>-<br>-                                                                         | AB006392<br>KP995509<br>AB006409                                                    |
| <i>Dipterocarpus obtusifolius</i>  | -<br>-<br>-<br>-                          | AB924839<br>KC765153<br>KC765154<br>KJ611233                                                             | DQ157297<br>AB925453<br>-<br>-                                                      | KP995510<br>DQ157292<br>-<br>-                                                      |
| <i>Dipterocarpus palembanicus</i>  | -<br>-<br>-<br>-<br>-<br>-<br>-<br>-<br>- | KY972926<br>KY972925<br>AB295903<br>KY972922<br>KY972921<br>KY972913<br>KY972912<br>MF418856<br>KU519691 | KY973123<br>KY973122<br>KY973119<br>KY973118<br>KY973110<br>KY973109<br>-<br>-<br>- | KY972728<br>KY972727<br>KY972724<br>KY972723<br>KY972715<br>KY972714<br>-<br>-<br>- |
| <i>Dipterocarpus retusus</i>       | MK193032<br>MK193031<br>-<br>-            | KJ611234<br>KF021568<br>MK051079<br>MK051078                                                             | KM267149<br>KP768999<br>MK030560<br>MK030559                                        | AY026529<br>MK051053<br>MK051052<br>AY026584                                        |
| <i>Dipterocarpus rigidus</i>       | -                                         | -                                                                                                        | -                                                                                   | KP995511                                                                            |
| <i>Dipterocarpus rotundifolius</i> | -                                         | -                                                                                                        | -                                                                                   | KP995512                                                                            |
| <i>Dipterocarpus sarawakensis</i>  | -                                         | -                                                                                                        | -                                                                                   | KP995513                                                                            |
| <i>Dipterocarpus semivestitus</i>  | -                                         | -                                                                                                        | -                                                                                   | KP995514                                                                            |
| <i>Dipterocarpus stellatus</i>     | -                                         | -                                                                                                        | -                                                                                   | KP995515                                                                            |
| <i>Dipterocarpus sublamellatus</i> | -                                         | KJ708906                                                                                                 | -                                                                                   | -                                                                                   |
| <i>Dipterocarpus tempehes</i>      | -                                         | KJ708907                                                                                                 | KJ594685                                                                            | KP995516                                                                            |
| <i>Dipterocarpus tuberculatus</i>  | -<br>-<br>-<br>-<br>-                     | KJ611232<br>KC765155<br>KC848889<br>KC848888<br>KC848887                                                 | DQ157296<br>KM267148<br>-<br>-<br>-                                                 | DQ157285<br>-<br>-<br>-<br>-                                                        |

**Supplementary Data A. (cont.)** Dipterocarpaceae sequences of *matK*, *rbcL*, *trnL* and ITS were retrieved from GenBank (NCBI) with accession number.

|                                  |                                          |                                                             |                                                           |                                                                                  |
|----------------------------------|------------------------------------------|-------------------------------------------------------------|-----------------------------------------------------------|----------------------------------------------------------------------------------|
| <i>Dipterocarpus turbinatus</i>  | MK051070<br>MK051069<br>-<br>-<br>-      | MK051081<br>MK051080<br>NC_046842<br>MN444783<br>-          | DQ157303<br>NC_046842<br>MN444783<br>MK030562<br>MK030561 | MK051055<br>MK051054<br>DQ157286<br>-<br>-                                       |
| <i>Dipterocarpus zeylanicus</i>  | -<br>-<br>-<br>-                         | KY972928<br>KY972927<br>KU686999<br>AB246474                | KY973125<br>KY973124<br>KU687001<br>-                     | KY972730<br>KY972729<br>AB246604<br>AB246539                                     |
| <i>Dryobalanops aromatica</i>    | AY026585<br>MW091490<br>-<br>-<br>-<br>- | AB006377<br>KY972931<br>KY972930<br>MW373534<br>-<br>-<br>- | MW373534<br>KY973127<br>KY973126<br>-<br>-<br>-<br>-      | AY026585<br>AB006411<br>KP995517<br>AY026530<br>KY972732<br>KY972733<br>AB006394 |
| <i>Dryobalanops beccarii</i>     | MH410665<br>-<br>-                       | KY972933<br>KY972932<br>MF418853                            | KY973129<br>KY973128<br>MF435535                          | KY972735<br>KY972734<br>-                                                        |
| <i>Dryobalanops lanceolata</i>   | AY026698<br>AY026697<br>AY026640         | KY972934<br>-<br>-                                          | KY973130<br>MF435536<br>-                                 | KY972736<br>AY026531<br>AY026586                                                 |
| <i>Dryobalanops oblongifolia</i> | MH410667<br>MH410666<br>-<br>-           | AB006378<br>-<br>-<br>-                                     | -<br>-<br>-<br>-                                          | KY972730<br>KY972729<br>AB246604<br>AB246539                                     |
| <i>Dryobalanops rappa</i>        | -                                        | KY972935                                                    | KY973131                                                  | KY972737                                                                         |
| <i>Hopea apiculata</i>           | AY026699<br>AY026641<br>-<br>-<br>-      | -<br>-<br>-<br>-<br>-                                       | EF660043<br>-<br>-<br>-<br>-                              | AY026532<br>KP995520<br>EF660004<br>AY026587<br>EF660023                         |

**Supplementary Data A. (cont.)** Dipterocarpaceae sequences of *matK*, *rbcL*, *trnL* and ITS were retrieved from GenBank (NCBI) with accession number.

|                              |                                     |                                                          |                                                   |                                                          |
|------------------------------|-------------------------------------|----------------------------------------------------------|---------------------------------------------------|----------------------------------------------------------|
| <i>Hopea beccariana</i>      | -<br>-<br>-<br>-<br>-               | -<br>-<br>-<br>-<br>-                                    | EF660047<br>KY979250<br>-<br>-<br>-               | KY979256<br>KP995521<br>EF660008<br>KY979253<br>EF660027 |
| <i>Hopea bilitonensis</i>    | -<br>-<br>-                         | -<br>-<br>-                                              | EF660051<br>-<br>-                                | KP995522<br>EF660012<br>EF660031                         |
| <i>Hopea bracteata</i>       | -<br>-                              | KY972939<br>KY972938                                     | -<br>-                                            | KY972741<br>KY972740                                     |
| <i>Hopea brevipetiolaris</i> | AY026700<br>AY026642<br>-<br>-<br>- | KY972906<br>KY972905<br>KY972904<br>-<br>-               | KX828981<br>KY973103<br>KY973102<br>KY973101<br>- | KY972709<br>KY972708<br>KY972707<br>AY026533<br>AY026588 |
| <i>Hopea celebica</i>        | AY026701<br>AY026643                | KY972945<br>KY972944                                     | -<br>-                                            | AY026534<br>AY026589                                     |
| <i>Hopea celtidifolia</i>    | AY026702<br>AY026644                | -<br>-                                                   | -<br>-                                            | AY026535<br>AY026590                                     |
| <i>Hopea centipeda</i>       | -<br>-                              | -<br>-                                                   | KY973141<br>KY973140                              | KY972747<br>KY972746                                     |
| <i>Hopea cernua</i>          | AY026703<br>AY026645                | -<br>-                                                   | -<br>-                                            | AY026536<br>AY026591                                     |
| <i>Hopea chinensis</i>       | MK193026<br>MK193025<br>-<br>-<br>- | MK051083<br>MK051082<br>KU321076<br>MN579508<br>KJ611239 | MN579508<br>KM267146<br>MK030564<br>MK030563<br>- | MK193024<br>MK051059<br>-<br>-<br>-                      |
| <i>Hopea cordifolia</i>      | AY026704<br>AY026646                | -<br>-                                                   | -<br>-                                            | AY026537<br>AY026592                                     |
| <i>Hopea discolor</i>        | -<br>-                              | AB246458<br>-                                            | -<br>-                                            | AB246588<br>AB246523                                     |

**Supplementary Data A. (cont.)** Dipterocarpaceae sequences of *matK*, *rbcL*, *trnL* and ITS were retrieved from GenBank (NCBI) with accession number.

|                             |                                                                  |                                                                                        |                                                                                               |                                                                                                          |
|-----------------------------|------------------------------------------------------------------|----------------------------------------------------------------------------------------|-----------------------------------------------------------------------------------------------|----------------------------------------------------------------------------------------------------------|
| <i>Hopea dryobalanoides</i> | AY026647<br>AY026705<br>-<br>-<br>-<br>-<br>-<br>-               | MH332601<br>KY972941<br>KY972940<br>MH791329<br>-<br>-<br>-<br>-                       | EF660039<br>KY973137<br>KY973136<br>MH791329<br>-<br>-<br>-<br>-                              | KY972743<br>KY972742<br>AB452045<br>AY026538<br>KP995523<br>EF660000<br>AB452253<br>AY026593<br>EF660019 |
| <i>Hopea dyeri</i>          | -<br>-<br>-<br>-<br>-                                            | KY972943<br>KY972942<br>-<br>-<br>-                                                    | EF660038<br>KY973139<br>KY973138<br>-<br>-                                                    | EF660018<br>EF659999<br>KP995524<br>KY972744<br>KY972745                                                 |
| <i>Hopea ferruginea</i>     | AY026706<br>AY026648<br>-<br>-                                   | KJ708954<br>-<br>-<br>-                                                                | EF660049<br>-<br>-<br>-                                                                       | AY026539<br>EF660010<br>AY026594<br>EF660029                                                             |
| <i>Hopea griffithii</i>     | -<br>-                                                           | KJ708956<br>KJ708955                                                                   | KJ594746<br>-                                                                                 | -<br>-                                                                                                   |
| <i>Hopea hainanensis</i>    | AY328172<br>MK193030<br>MK193029<br>MK193028<br>-<br>-<br>-<br>- | KJ611240<br>MK051086<br>MK051085<br>MK051084<br>NC_044642<br>MK035707<br>MN533970<br>- | AY328198<br>KM267147<br>NC_044642<br>MK035707<br>MN533970<br>MK030567<br>MK030566<br>MK030565 | AY328167<br>MK051062<br>MK051061<br>MK051060<br>-<br>-<br>-<br>-                                         |



**Supplementary Data A. (cont.)** Dipterocarpaceae sequences of *matK*, *rbcL*, *trnL* and ITS were retrieved from GenBank (NCBI) with accession number.

|                         |                                               |                                                                  |                                                           |                                                                                              |
|-------------------------|-----------------------------------------------|------------------------------------------------------------------|-----------------------------------------------------------|----------------------------------------------------------------------------------------------|
| <i>Hopea helferi</i>    | -<br>-<br>-<br>-<br>-                         | AB246457<br>-<br>-<br>-<br>-                                     | -<br>-<br>-<br>-<br>-                                     | AB246587<br>KP995525<br>EF660006<br>AB246522<br>EF660025                                     |
| <i>Hopea jucunda</i>    | AY026707<br>AY026649<br>-<br>-<br>-<br>-<br>- | KY972946<br>AB246459<br>KY972947<br>AB246460<br>-<br>-<br>-<br>- | KX828979<br>KY973142<br>KY973143<br>-<br>-<br>-<br>-<br>- | KY972748<br>AB246589<br>AY026540<br>KY972749<br>AB246590<br>AB246524<br>AY026595<br>AB246525 |
| <i>Hopea latifolia</i>  | -<br>-<br>-<br>-<br>-                         | AB246456<br>-<br>-<br>-<br>-                                     | EF660041<br>-<br>-<br>-<br>-                              | EF660021<br>AB246521<br>EF660002<br>KP995526<br>AB246586                                     |
| <i>Hopea macrocarpa</i> | -<br>-<br>-<br>-                              | -<br>-<br>-<br>-                                                 | KY979249<br>KY979249<br>-<br>-                            | KY979255<br>KY979254<br>KY979252<br>KY979251                                                 |

**Supplementary Data A. (cont.)** Dipterocarpaceae sequences of *matK*, *rbcL*, *trnL* and ITS were retrieved from GenBank (NCBI) with accession number.

|                         |          |          |          |          |
|-------------------------|----------|----------|----------|----------|
| <i>Hopea mengarawan</i> | AY026708 | KJ708957 | EF660044 | EF660024 |
|                         | AY026650 | -        | KJ594748 | AY026596 |
|                         | -        | -        | KJ594747 | AB452255 |
|                         | -        | -        | -        | AB452256 |
|                         | -        | -        | -        | AB452257 |
|                         | -        | -        | -        | EF660005 |
|                         | -        | -        | -        | KP995527 |
|                         | -        | -        | -        | AY026541 |
|                         | -        | -        | -        | AB452047 |
|                         | -        | -        | -        | AB452048 |
|                         | -        | -        | -        | AB452049 |
| <i>Hopea mollissima</i> | -        | KJ611237 | KM267145 | -        |
|                         | -        | KU321078 | -        | -        |
| <i>Hopea myrtifolia</i> | -        | -        | MN444985 | EF660009 |
|                         | -        | -        | MN444989 | MN445036 |
|                         | -        | -        | MN444995 | MN445034 |
|                         | -        | -        | MN444998 | MN445030 |
|                         | -        | -        | MN445007 | MN445027 |
|                         | -        | -        | EF660048 | EF660028 |
| <i>Hopea nervosa</i>    | AY026651 | AB006384 | EF660034 | AB006401 |
|                         | -        | KY972949 | KY973145 | KY972751 |
|                         | -        | KY972948 | KY973144 | KY972750 |
|                         | -        | -        | -        | KP995528 |
|                         | -        | -        | -        | KP995528 |
|                         | -        | -        | -        | EF659995 |
| <i>Hopea nigra</i>      | AY026709 | -        | -        | AY026542 |
|                         | AY026652 | -        | -        | AY026597 |
| <i>Hopea nutans</i>     | -        | -        | EF660042 | EF660003 |
|                         | -        | -        | -        | EF660022 |

**Supplementary Data A. (cont.)** Dipterocarpaceae sequences of *matK*, *rbcL*, *trnL* and ITS were retrieved from GenBank (NCBI) with accession number.

|                          |                                     |                                                                    |                                                                           |                                                                                  |
|--------------------------|-------------------------------------|--------------------------------------------------------------------|---------------------------------------------------------------------------|----------------------------------------------------------------------------------|
| <i>Hopea odorata</i>     | -<br>-<br>-<br>-<br>-<br>-<br>-     | AB006385<br>KY972951<br>KY972950<br>KJ611238<br>AB924765<br>-<br>- | KY973146<br>KY973147<br>AB925376<br>KM267144<br>EF660037<br>DQ157306<br>- | EF660017<br>AB006419<br>EF659998<br>KP995529<br>KY972752<br>KY972753<br>AB006402 |
| <i>Hopea parviflora</i>  | -                                   | JX163312                                                           | JX163307                                                                  | -                                                                                |
| <i>Hopea pentanervia</i> | -<br>-                              | KY972953<br>KY972952                                               | KY973149<br>KY973148                                                      | KY972755<br>KY972754                                                             |
| <i>Hopea pierrei</i>     | AY026710<br>AY026653<br>-<br>-<br>- | -<br>-<br>-<br>-<br>-                                              | DQ157307<br>EF660050<br>-<br>-<br>-                                       | AY026543<br>EF660011<br>AY026598<br>DQ157307<br>EF660030                         |
| <i>Hopea ponga</i>       | -                                   | JX163313                                                           | JX163308                                                                  | -                                                                                |
| <i>Hopea pubescens</i>   | AY026654<br>-<br>-<br>-             | -<br>-<br>-<br>-                                                   | EF660040<br>-<br>-<br>-                                                   | AY026544<br>KP995530<br>EF660001<br>AY026599                                     |
| <i>Hopea recopei</i>     | -<br>-                              | KC765150<br>585113462                                              | AB925529<br>-                                                             | -<br>-                                                                           |
| <i>Hopea reticulata</i>  | -<br>-                              | NC_052744<br>MT732516                                              | NC_052744<br>MT732516                                                     | -<br>-                                                                           |
| <i>Hopea sangal</i>      | -<br>-<br>-<br>-                    | KJ708960<br>KJ708959<br>KJ708958<br>-                              | EF660036<br>KJ594751<br>KJ594750<br>KJ594749                              | KP995531<br>EF659997<br>EF660016<br>-                                            |
| <i>Hopea subalata</i>    | AY026655<br>AY026711<br>-           | AB246455<br>-<br>-                                                 | EF660035<br>-<br>-                                                        | AB246585<br>EF659996<br>AB246520                                                 |

**Supplementary Data A. (cont.)** Dipterocarpaceae sequences of *matK*, *rbcL*, *trnL* and ITS were retrieved from GenBank (NCBI) with accession number.

|                                 |                                                             |                                                                                   |                                                                     |                                                                                  |
|---------------------------------|-------------------------------------------------------------|-----------------------------------------------------------------------------------|---------------------------------------------------------------------|----------------------------------------------------------------------------------|
| <i>Hopea utilis</i>             | -<br>-                                                      | KY972908<br>KY972907                                                              | KY973105<br>KY973104                                                | KY972711<br>KY972710                                                             |
| <i>Hopea vacciniifolia</i>      | -<br>-                                                      | KY972955<br>KY972954                                                              | KY973151<br>KY973150                                                | KY972757<br>KY972756                                                             |
| <i>Hopea wightiana</i>          | AY026712<br>AY026656<br>-<br>-<br>-<br>-<br>-               | AB246461<br>-<br>-<br>-<br>-<br>-<br>-                                            | EF660046<br>-<br>-<br>-<br>-<br>-<br>-                              | AB246591<br>AY026545<br>KP995532<br>EF660007<br>AB246526<br>AY026600<br>EF660026 |
| <i>Monotes adenophyllus</i>     | -                                                           | KY972958                                                                          | KY973155                                                            | KY972760                                                                         |
| <i>Monotes engleri</i>          | -                                                           | -                                                                                 | KU568012                                                            | -                                                                                |
| <i>Monotes glaber</i>           | -                                                           | -                                                                                 | JX572785                                                            | -                                                                                |
| <i>Monotes katangensis</i>      | -                                                           | KX146244                                                                          | KU568016                                                            | -                                                                                |
| <i>Monotes kerstingii</i>       | -                                                           | KY972959                                                                          | -                                                                   | KY972761                                                                         |
| <i>Monotes madagascariensis</i> | -<br>-                                                      | AB246478<br>-                                                                     | -<br>-                                                              | AB246608<br>AB246543                                                             |
| <i>Parashorea chinensis</i>     | MK051072<br>MK051071<br>KR532476<br>KR532475<br>-<br>-<br>- | AY305717<br>KJ611235<br>MK051088<br>MK051087<br>NC_046579<br>MK424049<br>AY305718 | KM267143<br>NC_046579<br>MK424049<br>MK030569<br>MK030568<br>-<br>- | AY305720<br>MK051057<br>MK051056<br>AY305721<br>AY305722<br>-<br>-               |
| <i>Parashorea densiflora</i>    | -                                                           | -                                                                                 | -                                                                   | KP995534                                                                         |
| <i>Parashorea globosa</i>       | AY026714<br>AY026658                                        | -<br>-                                                                            | -<br>-                                                              | AY026601<br>-                                                                    |

**Supplementary Data A. (cont.)** Dipterocarpaceae sequences of *matK*, *rbcL*, *trnL* and ITS were retrieved from GenBank (NCBI) with accession number.

|                                  |                                                                         |                                                                                                                          |                                                                                                                                                                                              |                                                                                                              |
|----------------------------------|-------------------------------------------------------------------------|--------------------------------------------------------------------------------------------------------------------------|----------------------------------------------------------------------------------------------------------------------------------------------------------------------------------------------|--------------------------------------------------------------------------------------------------------------|
| <i>Parashorea lucida</i>         | -<br>-<br>-<br>-<br>-                                                   | AB006382<br>-<br>-<br>-<br>-                                                                                             | MG895940<br>MN444980<br>MN444979<br>MN444975<br>MN444973                                                                                                                                     | AB006399<br>AB006416<br>MN445022<br>-<br>-                                                                   |
| <i>Parashorea macrophylla</i>    | -<br>-<br>-                                                             | KY972963<br>KY972962<br>MH791330                                                                                         | KY973160<br>KY973159<br>MH791330                                                                                                                                                             | KY972765<br>KY972764<br>-                                                                                    |
| <i>Parashorea malaanonan</i>     | -                                                                       | -                                                                                                                        | -                                                                                                                                                                                            | KP995535                                                                                                     |
| <i>Parashorea malanoon</i>       | -<br>-                                                                  | KY972965<br>KY972964                                                                                                     | KY973162<br>KY973161                                                                                                                                                                         | KY972767<br>KY972766                                                                                         |
| <i>Pseudomonotes tropenbosii</i> | -<br>-                                                                  | -<br>-                                                                                                                   | AF030238<br>-                                                                                                                                                                                | KF878351<br>KF878350                                                                                         |
| <i>Shorea acuminata</i>          | -<br>-<br>-<br>-<br>-<br>-<br>-<br>-<br>-<br>-<br>-<br>-<br>-<br>-<br>- | MG910371<br>MG910362<br>MG910361<br>MG910360<br>MG910358<br>MG910354<br>AB246440<br>-<br>-<br>-<br>-<br>-<br>-<br>-<br>- | MG895941<br>MG895939<br>MG895936<br>MN445009<br>MN445004<br>MN445003<br>MN444993<br>MN444990<br>MN444988<br>MN444987<br>MN444984<br>MN444974<br>MN444969<br>MN444964<br>MN444963<br>MN444955 | AB451979<br>AB451980<br>AB451981<br>AB451982<br>AB246570<br>KP995536<br>-<br>-<br>-<br>-<br>-<br>-<br>-<br>- |

**Supplementary Data A. (cont.)** Dipterocarpaceae sequences of *matK*, *rbcL*, *trnL* and ITS were retrieved from GenBank (NCBI) with accession number.

|                              |          |          |          |          |
|------------------------------|----------|----------|----------|----------|
| <i>Shorea acuminatissima</i> | AY026659 | KY972970 | KY973168 | KY972773 |
|                              | -        | KY972969 | KY973167 | KY972772 |
|                              | -        | -        | -        | AB451983 |
|                              | -        | -        | -        | AB451984 |
|                              | -        | -        | -        | AB451985 |
|                              | -        | -        | -        | AB451986 |
|                              | -        | -        | -        | KP995537 |
|                              | -        | -        | -        | AB452194 |
|                              | -        | -        | -        | AB452193 |
|                              | -        | -        | -        | AB452192 |
|                              | -        | -        | -        | AB452191 |
|                              | -        | -        | -        | AY026602 |
| <i>Shorea acuta</i>          | -        | KY972972 | -        | KY972775 |
|                              | -        | KY972971 | -        | KY972774 |
|                              | -        | -        | -        | AB451990 |
|                              | -        | -        | -        | AB451987 |
|                              | -        | -        | -        | AB451988 |
|                              | -        | -        | -        | AB451989 |
|                              | -        | -        | -        | AB452198 |
|                              | -        | -        | -        | AB452197 |
|                              | -        | -        | -        | AB452196 |
|                              | -        | -        | -        | AB452195 |
| <i>Shorea affinis</i>        | -        | AB246471 | -        | AB246601 |
|                              | -        | -        | -        | AB246536 |
| <i>Shorea agami</i>          | -        | KY972990 | KY973184 | KY972793 |
|                              | -        | KY972989 | KY973183 | KY972792 |
|                              | -        | -        | -        | AB451991 |
|                              | -        | -        | -        | AB451992 |
|                              | -        | -        | -        | KP995538 |
|                              | -        | -        | -        | AB452200 |
|                              | -        | -        | -        | AB452199 |



**Supplementary Data A. (cont.)** Dipterocarpaceae sequences of *matK*, *rbcL*, *trnL* and ITS were retrieved from GenBank (NCBI) with accession number.

|                             |                                 |                                          |                                          |                                                                                  |
|-----------------------------|---------------------------------|------------------------------------------|------------------------------------------|----------------------------------------------------------------------------------|
| <i>Shorea albida</i>        | -<br>-<br>-<br>-<br>-<br>-      | KY972975<br>KY972974<br>-<br>-<br>-<br>- | KY973171<br>KY973170<br>-<br>-<br>-<br>- | KY972778<br>KY972777<br>AB458535<br>AB458531<br>AB458536<br>AB458532             |
| <i>Shorea almon</i>         | -<br>-<br>-<br>-<br>-<br>-<br>- | -<br>-<br>-<br>-<br>-<br>-<br>-          | -<br>-<br>-<br>-<br>-<br>-<br>-          | AB451996<br>AB451995<br>AB451994<br>KP995539<br>AB452204<br>AB452203<br>AB452202 |
| <i>Shorea amplexicaulis</i> | -<br>-<br>-<br>-<br>-<br>-      | MF418837<br>-<br>-<br>-<br>-<br>-        | AY026715<br>AY026660<br>-<br>-<br>-<br>- | AB451998<br>AB451997<br>KP995540<br>AB452206<br>AB452205<br>AY026603             |
| <i>Shorea andulensis</i>    | -<br>-                          | -<br>-                                   | -<br>-                                   | AB451999<br>AB452207                                                             |
| <i>Shorea argentifolia</i>  | -<br>-<br>-<br>-<br>-           | KY972981<br>KY972980<br>-<br>-<br>-      | KY973177<br>KY973176<br>-<br>-<br>-      | KY972784<br>KY972783<br>AB452000<br>KP995541<br>AB452208                         |



**Supplementary Data A. (cont.)** Dipterocarpaceae sequences of *matK*, *rbcL*, *trnL* and ITS were retrieved from GenBank (NCBI) with accession number.

|                               |          |          |          |          |
|-------------------------------|----------|----------|----------|----------|
| <i>Shorea assamica</i>        | MK051073 | -        | MK030571 | AB452003 |
|                               | -        | -        | MK030570 | AB452002 |
|                               | -        | -        | -        | AB452001 |
|                               | -        | -        | -        | AB246583 |
|                               | -        | -        | -        | KP995542 |
|                               | -        | -        | -        | AB813033 |
|                               | -        | -        | -        | MK051063 |
|                               | -        | -        | -        | MK051058 |
|                               | -        | -        | -        | AB452211 |
|                               | -        | -        | -        | AB452210 |
|                               | -        | -        | -        | AB452209 |
|                               | -        | -        | -        | AB246518 |
|                               | -        | -        | -        | AB813035 |
| <i>Shorea atrinervosa</i>     | -        | KY973014 | KY973204 | KY972817 |
|                               | -        | KY973013 | KY973203 | KY972816 |
|                               | -        | -        | -        | AB452005 |
|                               | -        | -        | -        | AB452004 |
|                               | -        | -        | -        | KP995543 |
|                               | -        | -        | -        | AB452213 |
| <i>Shorea balangeran</i>      | AY026661 | -        | -        | AB452212 |
|                               | -        | -        | -        | AY026546 |
| <i>Shorea balanocarpoides</i> | -        | -        | -        | AY026604 |
|                               | -        | -        | -        | KP995544 |
| <i>Shorea beccariana</i>      | AY026716 | MF418825 | -        | AB452006 |
|                               | AY026662 | -        | -        | AY026547 |
|                               | -        | -        | -        | KP995545 |
|                               | -        | -        | -        | AB452214 |
|                               | -        | -        | -        | AY026605 |

**Supplementary Data A. (cont.)** Dipterocarpaceae sequences of *matK*, *rbcL*, *trnL* and ITS were retrieved from GenBank (NCBI) with accession number.

|                               |   |          |          |          |
|-------------------------------|---|----------|----------|----------|
| <i>Shorea biawak</i>          | - | KY972987 | KY973181 | KY972790 |
|                               | - | KY972986 | KY973180 | KY972789 |
|                               | - | MF418823 | -        | AB452009 |
|                               | - | -        | -        | AB452008 |
|                               | - | -        | -        | AB452007 |
|                               | - | -        | -        | AB452217 |
|                               | - | -        | -        | AB452216 |
| <i>Shorea bracteolata</i>     | - | -        | -        | AB452215 |
|                               | - | AB006381 | MG895950 | AB006398 |
|                               | - | MG910357 | MG895937 | KY972791 |
|                               | - | MG910355 | MN444997 | AB452011 |
|                               | - | KY972988 | MN444977 | AB452010 |
|                               | - | -        | MN444972 | KP995546 |
|                               | - | -        | MN444961 | AB006415 |
|                               | - | -        | KY973182 | AB006381 |
|                               | - | -        | -        | AB452219 |
|                               | - | -        | -        | AB452218 |
|                               | - | -        | -        | MN445035 |
|                               | - | -        | -        | MN445024 |
|                               | - | -        | -        | MN445021 |
|                               | - | -        | -        | MN445020 |
| <i>Shorea brevipetiolaris</i> | - | -        | KX944295 | -        |
| <i>Shorea bullata</i>         | - | AB295884 | -        | AB452012 |
|                               | - | AB295883 | -        | AB246565 |
|                               | - | AB295882 | -        | AB452220 |
|                               | - | AB295881 | -        | AB246500 |
|                               | - | AB295880 | -        | -        |
|                               | - | AB295879 | -        | -        |
|                               | - | AB295878 | -        | -        |
|                               | - | AB246435 | -        | -        |

**Supplementary Data A. (cont.)** Dipterocarpaceae sequences of *matK*, *rbcL*, *trnL* and ITS were retrieved from GenBank (NCBI) with accession number.

|                             |                                      |                                             |                                        |                                                                                                                                           |
|-----------------------------|--------------------------------------|---------------------------------------------|----------------------------------------|-------------------------------------------------------------------------------------------------------------------------------------------|
| <i>Shorea collina</i>       | -<br>-<br>-                          | -<br>-<br>-                                 | -<br>-<br>-                            | AB452014<br>KP995547<br>AB452222                                                                                                          |
| <i>Shorea compressa</i>     | -                                    | MH332574                                    | MH332440                               | -                                                                                                                                         |
| <i>Shorea confusa</i>       | -<br>-<br>-<br>-<br>-<br>-           | KY972973<br>MF418851<br>-<br>-<br>-<br>-    | KY973169<br>-<br>-<br>-<br>-<br>-<br>- | KY972776<br>AB452017<br>AB452016<br>AB452015<br>AB452225<br>AB452224<br>AB452223                                                          |
| <i>Shorea congestiflora</i> | -<br>-                               | AB246463<br>-                               | -<br>-                                 | AB246593<br>AB246528                                                                                                                      |
| <i>Shorea cordifolia</i>    | AY026663<br>-                        | KY972991<br>KY972992                        | -<br>-                                 | AB246592<br>AB246527                                                                                                                      |
| <i>Shorea coriacea</i>      | -                                    | -                                           | -                                      | KP995548                                                                                                                                  |
| <i>Shorea crassa</i>        | -<br>-<br>-<br>-                     | KY972992<br>-<br>-<br>-                     | KY973186<br>KY973185<br>-<br>-         | KY972795<br>KY972794<br>AB452018<br>AB452226                                                                                              |
| <i>Shorea curtisii</i>      | -<br>-<br>-<br>-<br>-<br>-<br>-<br>- | AB246433<br>-<br>-<br>-<br>-<br>-<br>-<br>- | -<br>-<br>-<br>-<br>-<br>-<br>-<br>-   | AB588578 - AB588604<br>AB246498<br>AB452227 - AB452228<br>AB617871 - AB368887<br>AB368888<br>KP995549<br>AB246563<br>AB452019<br>AB452020 |

**Supplementary Data A. (cont.)** Dipterocarpaceae sequences of *matK*, *rbcL*, *trnL* and ITS were retrieved from GenBank (NCBI) with accession number.

|                           |          |          |          |          |
|---------------------------|----------|----------|----------|----------|
| <i>Shorea dasyphylla</i>  | -        | -        | MN444978 | AB452022 |
|                           | -        | -        | MN444959 | AB452021 |
|                           | -        | -        | MN444958 | KP995550 |
|                           | -        | -        | -        | AB452230 |
|                           | -        | -        | -        | AB452229 |
| <i>Shorea disticha</i>    | -        | KY972929 | -        | KY972731 |
|                           | -        | AB246465 | -        | AB246595 |
|                           | -        | -        | -        | AB246530 |
| <i>Shorea domatiosa</i>   | -        | KY973040 | KY973230 | KY972843 |
|                           | -        | KY973039 | KY973229 | KY972842 |
|                           | -        | MF418822 | -        | AB452023 |
|                           | -        | -        | -        | KP995551 |
|                           | -        | -        | -        | AB452231 |
| <i>Shorea dyeri</i>       | -        | AB246446 | -        | AB246576 |
|                           | -        | -        | -        | AB246511 |
| <i>Shorea elliptica</i>   | -        | AB246444 | -        | AB246574 |
|                           | -        | -        | -        | AB246509 |
| <i>Shorea exelliptica</i> | AY026717 | KY972994 | KY973188 | KY972797 |
|                           | AY026664 | KY972993 | KY973187 | KY972796 |
|                           | -        | -        | -        | AY026548 |
|                           | -        | -        | -        | KP995552 |
|                           | -        | -        | -        | AY026606 |
| <i>Shorea faguetiana</i>  | MH410685 | -        | DQ157311 | AB452026 |
|                           | AY026718 | -        | -        | AB452025 |
|                           | AY026665 | -        | -        | AB452024 |
|                           | -        | -        | -        | AY026549 |
|                           | -        | -        | -        | KP995553 |
|                           | -        | -        | -        | AB452234 |
|                           | -        | -        | -        | AB452233 |
|                           | -        | -        | -        | AB452232 |
|                           | -        | -        | -        | AY026607 |

**Supplementary Data A. (cont.)** Dipterocarpaceae sequences of *matK*, *rbcL*, *trnL* and ITS were retrieved from GenBank (NCBI) with accession number.

|                             |                                                                              |                                                                                                                                                                  |                                                                                            |                                                                                                                                                                                              |
|-----------------------------|------------------------------------------------------------------------------|------------------------------------------------------------------------------------------------------------------------------------------------------------------|--------------------------------------------------------------------------------------------|----------------------------------------------------------------------------------------------------------------------------------------------------------------------------------------------|
| <i>Shorea faguetioides</i>  | -<br>-<br>-                                                                  | KY973019<br>-<br>-                                                                                                                                               | KY973209<br>-<br>-                                                                         | KY972822<br>AB452027<br>AB452235                                                                                                                                                             |
| <i>Shorea falcifera</i>     | -<br>-                                                                       | -<br>-                                                                                                                                                           | -<br>-                                                                                     | AB452236<br>AB452028                                                                                                                                                                         |
| <i>Shorea falciferoides</i> | -<br>-                                                                       | -<br>-                                                                                                                                                           | -<br>-                                                                                     | AB452029<br>AB452237                                                                                                                                                                         |
| <i>Shorea fallax</i>        | -<br>-<br>-<br>-<br>-<br>-<br>-<br>-<br>-<br>-<br>-<br>-<br>-<br>-<br>-<br>- | KY973052<br>KY973051<br>MH332594<br>MF418834<br>AB295891<br>AB295890<br>AB295889<br>AB295888<br>AB295887<br>AB295886<br>AB295885<br>AB246434<br>-<br>-<br>-<br>- | KY973242<br>KY973241<br>-<br>-<br>-<br>-<br>-<br>-<br>-<br>-<br>-<br>-<br>-<br>-<br>-<br>- | KY972855<br>KY972854<br>AB452035<br>AB452034<br>AB452033<br>AB452032<br>AB452031<br>AB452030<br>AB246564<br>AB452243<br>AB452242<br>AB452241<br>AB452240<br>AB452239<br>AB452238<br>AB246499 |
| <i>Shorea ferruginea</i>    | -<br>-<br>-<br>-<br>-                                                        | KY973000<br>KY972999<br>MF418832<br>-<br>-<br>-                                                                                                                  | KY973192<br>KY973191<br>-<br>-<br>-                                                        | KY972803<br>KY972802<br>AB452037<br>AB452036<br>AB452245<br>AB452244                                                                                                                         |
| <i>Shorea flaviflora</i>    | -<br>-<br>-                                                                  | -<br>-<br>-                                                                                                                                                      | -<br>-<br>-                                                                                | AB452038<br>KP995554<br>AB452246                                                                                                                                                             |

**Supplementary Data A. (cont.)** Dipterocarpaceae sequences of *matK*, *rbcL*, *trnL* and ITS were retrieved from GenBank (NCBI) with accession number.

|                           |          |          |          |          |
|---------------------------|----------|----------|----------|----------|
| <i>Shorea foxworthyi</i>  | AY026719 | -        | -        | AB452039 |
|                           | AY026666 | -        | -        | AY026550 |
|                           | -        | -        | -        | KP995555 |
|                           | -        | -        | -        | AB452247 |
|                           | -        | -        | -        | AY026608 |
| <i>Shorea gardneri</i>    | -        | AB246468 | -        | AB246598 |
|                           | -        | -        | -        | AB246533 |
| <i>Shorea gibbosa</i>     | -        | KY973035 | MG895948 | KY972838 |
|                           | -        | KY973034 | KJ594885 | KY972837 |
|                           | -        | KJ709080 | KJ594884 | AB452040 |
|                           | -        | KJ709079 | MN444976 | KP995556 |
|                           | -        | KJ709078 | KY973225 | AB452248 |
|                           | -        | -        | KY973224 | MN445023 |
| <i>Shorea glauca</i>      | -        | -        | -        | KP995557 |
| <i>Shorea glaucescens</i> | -        | KY973004 | KY973196 | KY972807 |
|                           | -        | KY973003 | KY973195 | KY972806 |
| <i>Shorea grattissima</i> | -        | -        | KJ594886 | -        |
| <i>Shorea guiso</i>       | AY026667 | AB924902 | DQ157309 | AB452041 |
|                           | AY026720 | -        | AB925523 | AY026551 |
|                           | -        | -        | -        | KP995558 |
|                           | -        | -        | -        | AB452249 |
|                           | -        | -        | -        | AY026609 |
| <i>Shorea havilandii</i>  | MH410668 | KY973006 | KY973198 | KY972809 |
|                           | -        | KY973005 | KY973197 | KY972808 |
|                           | -        | -        | -        | AB452044 |
|                           | -        | -        | -        | AB452043 |
|                           | -        | -        | -        | AB452042 |
|                           | -        | -        | -        | AB452252 |
|                           | -        | -        | -        | AB452251 |
|                           | -        | -        | -        | AB452250 |
| <i>Shorea hemsleyana</i>  | -        | -        | -        | KP995559 |

**Supplementary Data A. (cont.)** Dipterocarpaceae sequences of *matK*, *rbcL*, *trnL* and ITS were retrieved from GenBank (NCBI) with accession number.

|                                |                       |                                                          |                       |                                                                                            |
|--------------------------------|-----------------------|----------------------------------------------------------|-----------------------|--------------------------------------------------------------------------------------------|
| <i>Shorea henryana</i>         | -<br>-<br>-<br>-<br>- | KY973007<br>AB925024<br>-<br>-<br>-                      | -<br>-<br>-<br>-<br>- | KY972810<br>AB452046<br>KP995560<br>AB452254<br>DQ157287                                   |
| <i>Shorea hopeifolia</i>       | AY026721<br>AY026668  | MH332581                                                 | MH332444              | AY026552<br>AY026610                                                                       |
| <i>Shorea inaequilateralis</i> | -<br>-                | KY973009<br>KY973008                                     | -<br>-                | KY972812<br>KY972811                                                                       |
| <i>Shorea inappendiculata</i>  | MH410679              | -<br>-                                                   | -<br>-                | AB452050<br>AB452258                                                                       |
| <i>Shorea isoptera</i>         | AY026669<br>AY026722  | -<br>-<br>-<br>-<br>-                                    | -<br>-<br>-<br>-<br>- | AB452051<br>AY026553<br>KP995561<br>AB452259<br>AY026611                                   |
| <i>Shorea javanica</i>         | AY026723<br>AY026670  | -<br>-<br>-<br>-<br>-                                    | -<br>-<br>-<br>-<br>- | AB452052<br>AY026554<br>AB787506<br>AB452260<br>AY026612                                   |
| <i>Shorea johorensis</i>       | MH410696<br>AY026671  | KY973023<br>KY973022<br>MF993320                         | KY973213<br>KY973212  | AY026613<br>AB452261 - AB452267<br>AY026555 - AB452059<br>KY972825 - KY972826              |
| <i>Shorea kunstleri</i>        | AY026724<br>AY026672  | AB295896<br>AB295895<br>AB295894<br>AB295893<br>AB295892 | -<br>-<br>-<br>-<br>- | AY026614<br>AB452268 - AB452270<br>KP995562<br>AY026556<br>AB452060<br>AB452061 - AB452062 |

**Supplementary Data A. (cont.)** Dipterocarpaceae sequences of *matK*, *rbcL*, *trnL* and ITS were retrieved from GenBank (NCBI) with accession number.

|                           |                                                                |                                                                       |                                                                                   |                                                                                                                                                                                         |
|---------------------------|----------------------------------------------------------------|-----------------------------------------------------------------------|-----------------------------------------------------------------------------------|-----------------------------------------------------------------------------------------------------------------------------------------------------------------------------------------|
| <i>Shorea laevis</i>      | AY026725<br>AY026673                                           | KY972983<br>KY972982<br>MH332600<br>AB246449                          | MH332461<br>KY973179<br>KY973178<br>-<br>-<br>-<br>-<br>-<br>-<br>-               | AB246514<br>AB452271<br>AB452272<br>AB452273<br>KP995563<br>AY026557<br>KY972785<br>KY972786<br>AB246579<br>AB452063<br>AB452064<br>AB452065                                            |
| <i>Shorea lepidota</i>    | -<br>-<br>-                                                    | -<br>-<br>-                                                           | -<br>-<br>-                                                                       | AB452066<br>KP995564<br>AB452274                                                                                                                                                        |
| <i>Shorea leprosula</i>   | MH410675<br>MH410669<br>AY026674<br>-<br>-<br>-<br>-<br>-<br>- | KY973021<br>KY973020<br>MH332586<br>AB246439<br>-<br>-<br>-<br>-<br>- | MH332452<br>MN445013<br>MN445010<br>KY973211<br>KY973210<br>-<br>-<br>-<br>-<br>- | MN445044<br>AY026616<br>AB246504<br>AB452275 - AB452279<br>AB368889 - AB368891<br>KP995565<br>AB246569<br>AB452067 - AB452069<br>AY026558<br>AB452070 - AB452071<br>KY972823 - KY972824 |
| <i>Shorea lissophylla</i> | -<br>-                                                         | AB246447<br>-                                                         | -<br>-                                                                            | AB246577<br>AB246512                                                                                                                                                                    |
| <i>Shorea longiflora</i>  | -<br>-<br>-<br>-                                               | -<br>-<br>-<br>-                                                      | -<br>-<br>-<br>-                                                                  | AB452073<br>AB452072<br>AB452281<br>AB452280                                                                                                                                            |



**Supplementary Data A. (cont.)** Dipterocarpaceae sequences of *matK*, *rbcL*, *trnL* and ITS were retrieved from GenBank (NCBI) with accession number.

|                           |          |          |          |                     |
|---------------------------|----------|----------|----------|---------------------|
| <i>Shorea longisperma</i> | AY026726 | -        | -        | AB452074            |
|                           | AY026675 | -        | -        | AY026559            |
|                           | -        | -        | -        | KP995566            |
|                           | -        | -        | -        | AB452282            |
|                           | -        | -        | -        | AY026617            |
| <i>Shorea lumutensis</i>  | -        | -        | -        | KP995567            |
| <i>Shorea macrantha</i>   | -        | -        | -        | KP995568            |
| <i>Shorea macrophylla</i> | AY026676 | AB246441 | -        | AB452079 - AB452083 |
|                           | AY026727 | -        | -        | AB246571            |
|                           | MH410694 | -        | -        | AY026560            |
|                           | MH410695 | -        | -        | KP995569            |
|                           | -        | -        | -        | AB452287 - AB452291 |
|                           | -        | -        | -        | AB246506            |
|                           | -        | -        | -        | AY026618            |
| <i>Shorea macroptera</i>  | AY026677 | AB006379 | KY973216 | AB006396            |
|                           | AY026728 | AB246438 | KY973219 | AB452084 - AB452087 |
|                           | -        | MF418833 | KY973218 | AB246568            |
|                           | -        | KY973029 | KY973217 | KP995570            |
|                           | -        | KY973028 | -        | KY972829 - KY972832 |
|                           | -        | KY973027 | -        | AB452075 - AB452089 |
|                           | -        | KY973026 | -        | AB006413            |
|                           | -        | -        | -        | AB452292 - AB452295 |
|                           | -        | -        | -        | AB246503            |
| <i>Shorea materialis</i>  | AY026729 | -        | -        | AB452092            |
|                           | AY026678 | -        | -        | AB452091            |
|                           | -        | -        | -        | AB452090            |
|                           | -        | -        | -        | AY026561            |
|                           | -        | -        | -        | KP995571            |
|                           | -        | -        | -        | AB452300            |
|                           | -        | -        | -        | AB452299            |
|                           | -        | -        | -        | AB452298            |
|                           | -        | -        | -        | AY026619            |

**Supplementary Data A. (cont.)** Dipterocarpaceae sequences of *matK*, *rbcL*, *trnL* and ITS were retrieved from GenBank (NCBI) with accession number.

|                             |                                                                                  |                                               |                                               |                                                                                              |
|-----------------------------|----------------------------------------------------------------------------------|-----------------------------------------------|-----------------------------------------------|----------------------------------------------------------------------------------------------|
| <i>Shorea maxima</i>        | AY026730<br>AY026679<br>-<br>-<br>-<br>-<br>-                                    | -<br>-<br>-<br>-<br>-<br>-<br>-               | -<br>-<br>-<br>-<br>-<br>-<br>-               | AY026620<br>AB452301<br>AB452302<br>KP995572<br>AY026562<br>AB452093<br>AB452094             |
| <i>Shorea maxwelliana</i>   | MH410691<br>MH410690<br>MH410689<br>MH410687<br>MH410672<br>AY026731<br>AY026680 | -<br>-<br>-<br>-<br>-<br>-<br>-               | -<br>-<br>-<br>-<br>-<br>-<br>-               | AB452095<br>AY026563<br>KP995573<br>AB452303<br>AY026621<br>-<br>-                           |
| <i>Shorea mecistopteryx</i> | -<br>-<br>-<br>-<br>-<br>-<br>-                                                  | KY973033<br>KY973032<br>-<br>-<br>-<br>-<br>- | KY973223<br>KY973222<br>-<br>-<br>-<br>-<br>- | KY972836<br>KY972835<br>AB452097<br>AB452096<br>AY026564<br>KP995574<br>AB452305<br>AB452304 |
| <i>Shorea megistophylla</i> | -<br>-                                                                           | AB246464<br>-                                 | -<br>-                                        | AB246594<br>AB246529                                                                         |
| <i>Shorea mujongensis</i>   | -<br>-                                                                           | -<br>-                                        | -<br>-                                        | AB452098<br>AB452306                                                                         |
| <i>Shorea multiflora</i>    | AY026732<br>AY026681<br>-<br>-<br>-                                              | AB246451<br>-<br>-<br>-<br>-                  | -<br>-<br>-<br>-<br>-                         | AB246581<br>AY026565<br>KP995575<br>AB246516<br>AY026622                                     |

**Supplementary Data A. (cont.)** Dipterocarpaceae sequences of *matK*, *rbcL*, *trnL* and ITS were retrieved from GenBank (NCBI) with accession number.

|                            |          |          |          |                     |
|----------------------------|----------|----------|----------|---------------------|
| <i>Shorea myrionerva</i>   | -        | KY973037 | KY973226 | KY972840            |
|                            | -        | KY973036 | KY973227 | KY972839            |
| <i>Shorea oblongifolia</i> | -        | KY973038 | KY973228 | KY972841            |
| <i>Shorea obscura</i>      | -        | KY973011 | KY973201 | KY972813 - KY972814 |
|                            | -        | KY973010 | KY973200 | AB452100            |
|                            | -        | MF418820 | -        | KP995576            |
|                            | -        | -        | -        | AB452308            |
| <i>Shorea obtusa</i>       | -        | AB924709 | AB925715 | -                   |
|                            | -        | AB925086 | AB925452 | -                   |
|                            | -        | AB924838 | AB925320 | -                   |
| <i>Shorea ochracea</i>     | -        | MF418852 | KY973232 | KY972844 - KY972845 |
|                            | -        | KY973042 | KY973231 | AB452101 - AB452103 |
|                            | -        | KY973041 | -        | KP995577            |
|                            | -        | -        | -        | AB452309 - AB452311 |
| <i>Shorea ochrophloia</i>  | -        | KJ709081 | -        | AB452104            |
|                            | -        | -        | -        | KP995578            |
|                            | -        | -        | -        | AB452312            |
| <i>Shorea ovalifolia</i>   | -        | -        | KX828980 | AB246597            |
|                            | -        | -        | -        | AB246532            |
| <i>Shorea ovalis</i>       | AY026733 | AB006380 | MN445012 | MN445025            |
|                            | AY026682 | MG910359 | MN444992 | AY026623            |
|                            | -        | KJ709082 | MN444991 | AB452313 - AB452315 |
|                            | -        | KY973044 | MN444983 | AB006380            |
|                            | -        | KY973043 | MN444970 | AB006414            |
|                            | -        | -        | KY973234 | KY972846 - KY972847 |
|                            | -        | -        | KY973233 | KP995579            |
|                            | -        | -        | -        | AY026566            |
|                            | -        | -        | -        | AB452105 - AB452107 |
|                            | -        | -        | -        | AB006397            |

**Supplementary Data A. (cont.)** Dipterocarpaceae sequences of *matK*, *rbcL*, *trnL* and ITS were retrieved from GenBank (NCBI) with accession number.

|                           |                                                                                                                                   |                                                                                                                                               |                                                                                                                                                                                                                              |                                                                                                                                               |
|---------------------------|-----------------------------------------------------------------------------------------------------------------------------------|-----------------------------------------------------------------------------------------------------------------------------------------------|------------------------------------------------------------------------------------------------------------------------------------------------------------------------------------------------------------------------------|-----------------------------------------------------------------------------------------------------------------------------------------------|
| <i>Shorea ovata</i>       | -<br>-<br>-<br>-                                                                                                                  | KY973046<br>KY973045<br>-<br>-                                                                                                                | KY973236<br>KY973235<br>-<br>-                                                                                                                                                                                               | KY972848 - KY972849<br>AB452108<br>KP995580<br>AB452316                                                                                       |
| <i>Shorea pachyphylla</i> | -<br>-<br>-                                                                                                                       | KY973047 - KY973048<br>NC_040966<br>MH841940                                                                                                  | KY973237 - KY973238<br>NC_040966<br>MH841940                                                                                                                                                                                 | KY972851<br>KY972850<br>-                                                                                                                     |
| <i>Shorea palembanica</i> | MH410693<br>MH410692<br>AY026734<br>-<br>-                                                                                        | -<br>-<br>-<br>-<br>-                                                                                                                         | -<br>-<br>-<br>-<br>-                                                                                                                                                                                                        | AB452109<br>AY026567<br>KP995581<br>AB452317<br>AY026624                                                                                      |
| <i>Shorea pallescens</i>  | -<br>-                                                                                                                            | AB246448<br>-                                                                                                                                 | -<br>-                                                                                                                                                                                                                       | AB246578<br>AB246513                                                                                                                          |
| <i>Shorea palosapis</i>   | -<br>-<br>-                                                                                                                       | -<br>-<br>-                                                                                                                                   | -<br>-<br>-                                                                                                                                                                                                                  | AB452110<br>KP995582<br>AB452318                                                                                                              |
| <i>Shorea parvifolia</i>  | MH410700<br>MH410699<br>MH410698<br>MH410697<br>MH410682<br>MH410676<br>MH410670<br>AY026735<br>FJ794791<br>-<br>-<br>-<br>-<br>- | MG910372<br>MG910370<br>MG910366<br>MG910365<br>MG910364<br>MG910356<br>AB246437<br>KY973050<br>KY973049<br>MF418826<br>-<br>-<br>-<br>-<br>- | MG895949<br>MG895943 - MG895945<br>MG895938<br>MN445014 - MN445015<br>MN445011<br>MN445006<br>MN445001<br>MN444996<br>MN444994<br>MN444986<br>MN444982<br>MN444981<br>MN444971<br>MN444956 - MN444957<br>KY973239 - KY973240 | AB368898<br>KP995583<br>AY026568<br>AB246567<br>AB452111<br>AB452112<br>AB452113<br>AB452114<br>AB452115<br>AB452116<br>-<br>-<br>-<br>-<br>- |

**Supplementary Data A. (cont.)** Dipterocarpaceae sequences of *matK*, *rbcL*, *trnL* and ITS were retrieved from GenBank (NCBI) with accession number.

|                              |          |          |          |          |
|------------------------------|----------|----------|----------|----------|
| <i>Shorea parvistipulata</i> | AY026736 | MH332587 | MH332453 | KY972805 |
|                              | AY026683 | MH332572 | MH332438 | KY972804 |
|                              | -        | MH332570 | MH332436 | AB452118 |
|                              | -        | KY973002 | KY973194 | AB452117 |
|                              | -        | KY973001 | KY973193 | AY026569 |
|                              | -        | -        | -        | AB452326 |
| <i>Shorea patoiensis</i>     | -        | -        | -        | AB452325 |
|                              | -        | -        | -        | AB452327 |
|                              | -        | -        | -        | AB452122 |
|                              | -        | -        | -        | AB452121 |
|                              | -        | -        | -        | AB452120 |
|                              | -        | -        | -        | AB452119 |
|                              | -        | -        | -        | AB452330 |
|                              | -        | -        | -        | AB452329 |
| <i>Shorea pauciflora</i>     | MH410674 | KJ709083 | MN445000 | AB452328 |
|                              | -        | -        | MN444999 | AB452126 |
|                              | -        | -        | -        | AB452125 |
|                              | -        | -        | -        | AB452124 |
|                              | -        | -        | -        | AB452123 |
|                              | -        | -        | -        | KP995584 |
|                              | -        | -        | -        | AB452334 |
|                              | -        | -        | -        | AB452333 |
|                              | -        | -        | -        | AB452332 |
|                              | -        | -        | -        | AB452331 |
|                              | -        | -        | -        | MN445038 |
| <i>Shorea peltata</i>        | MH410671 | -        | -        | MN445037 |
|                              | -        | -        | -        | AB452127 |
|                              |          |          |          | AB452335 |

**Supplementary Data A. (cont.)** Dipterocarpaceae sequences of *matK*, *rbcL*, *trnL* and ITS were retrieved from GenBank (NCBI) with accession number.

|                           |          |          |          |          |
|---------------------------|----------|----------|----------|----------|
| <i>Shorea pilosa</i>      | AY026737 | -        | -        | AB452130 |
|                           | AY026684 | -        | -        | AB452129 |
|                           | -        | -        | -        | AB452128 |
|                           | -        | -        | -        | AY026570 |
|                           | -        | -        | -        | KP995585 |
|                           | -        | -        | -        | AB452338 |
|                           | -        | -        | -        | AB452337 |
|                           | -        | -        | -        | AB452336 |
| <i>Shorea pinanga</i>     | -        | -        | -        | AY026627 |
|                           | AY026685 | MF418836 | -        | AB452131 |
|                           | -        | AB246445 | -        | AB246575 |
|                           | -        | -        | -        | AY026571 |
|                           | -        | -        | -        | KP995586 |
|                           | -        | -        | -        | AB452339 |
|                           | -        | -        | -        | AB246510 |
|                           | -        | -        | -        | AY026628 |
| <i>Shorea platycarpa</i>  | -        | -        | -        | AB452132 |
|                           | -        | -        | -        | KP995587 |
|                           | -        | -        | -        | AB452340 |
| <i>Shorea platyclados</i> | -        | -        | KF582826 | AB452135 |
|                           | -        | -        | KF582827 | AB452134 |
|                           | -        | -        | KF582828 | AB452133 |
|                           | -        | -        | KF582829 | KP995588 |
|                           | -        | -        | KF582830 | AB452343 |
|                           | -        | -        | KF582831 | AB452342 |
|                           | -        | -        | KF582832 | AB452341 |
|                           | -        | -        | KF582833 | KU170186 |
|                           | -        | -        | KF582834 | KU170185 |
|                           | -        | -        | KU170161 | KU170184 |
|                           | -        | -        | KU170162 | KF582848 |
|                           | -        | -        | KU170163 | KF582847 |
|                           | -        | -        | KU170164 | KF582846 |

**Supplementary Data A. (cont.)** Dipterocarpaceae sequences of *matK*, *rbcL*, *trnL* and ITS were retrieved from GenBank (NCBI) with accession number.

|                            |                                                  |                                                        |                                                                                                          |                                                                                                       |
|----------------------------|--------------------------------------------------|--------------------------------------------------------|----------------------------------------------------------------------------------------------------------|-------------------------------------------------------------------------------------------------------|
| <i>Shorea pubistyla</i>    | -<br>-<br>-                                      | -<br>-<br>-                                            | -<br>-<br>-                                                                                              | AB452136<br>KP995589<br>AB452344                                                                      |
| <i>Shorea quadrinervis</i> | -<br>-<br>-<br>-<br>-<br>-                       | KY973058<br>KY973057<br>MH332602<br>AB246436<br>-<br>- | MH332462<br>KY973248<br>KY973247<br>-<br>-<br>-                                                          | KY972860 - KY972861<br>AB452137 - AB452139<br>AB246566<br>KP995590<br>AB452345 - AB452347<br>AB246501 |
| <i>Shorea resinosa</i>     | -<br>-<br>-                                      | -<br>-<br>-                                            | -<br>-<br>-                                                                                              | AB452140<br>KP995591<br>AB452348                                                                      |
| <i>Shorea richetia</i>     | AY026738<br>AY026686<br>-<br>-                   | AB246442<br>-<br>-<br>-                                | -<br>-<br>-<br>-                                                                                         | AB246572<br>AY026572<br>AB246507<br>AY026629                                                          |
| <i>Shorea robusta</i>      | KM514673<br>-<br>-<br>-<br>-<br>-<br>-<br>-<br>- | KY973059<br>-<br>-<br>-<br>-<br>-<br>-<br>-<br>-       | KY654498<br>KY654497<br>KY654496<br>KY654495<br>KX010597<br>JX856763<br>JX856762<br>KY973249<br>MG564652 | KY972862<br>-<br>-<br>-<br>-<br>-<br>-<br>-<br>-                                                      |
| <i>Shorea roxburghii</i>   | AY026739<br>AY026687<br>-<br>-<br>-              | KY973060<br>KJ611242<br>MG737433<br>AB924743<br>-<br>- | KM267142<br>AB925355<br>KY973250<br>-<br>-<br>-                                                          | KY972863<br>AB452141 - AB452144<br>AY026573<br>KP995592<br>AB452349 - AB452352<br>AY026630            |

**Supplementary Data A. (cont.)** Dipterocarpaceae sequences of *matK*, *rbcL*, *trnL* and ITS were retrieved from GenBank (NCBI) with accession number.

|                            |                                                                   |                                                |                                                |                                                                                                                                              |
|----------------------------|-------------------------------------------------------------------|------------------------------------------------|------------------------------------------------|----------------------------------------------------------------------------------------------------------------------------------------------|
| <i>Shorea rubra</i>        | -<br>-<br>-<br>-                                                  | KY973054<br>KY973053<br>-<br>-                 | KY973244<br>KY973243<br>-<br>-                 | KY972856 - KY972857<br>AB452145 - AB452147<br>KP995593<br>AB452353 - AB452355                                                                |
| <i>Shorea rugosa</i>       | -<br>-<br>-                                                       | -<br>-<br>-                                    | -<br>-<br>-                                    | AB452148<br>KP995594<br>AB452356                                                                                                             |
| <i>Shorea scaberrima</i>   | AY026740<br>AY026688<br>-<br>-<br>-<br>-                          | KY973062<br>-<br>-<br>-<br>-<br>-              | KY973252<br>-<br>-<br>-<br>-<br>-              | KY972865<br>AB452149<br>AY026574<br>KP995595<br>AB452357<br>AY026631                                                                         |
| <i>Shorea scrobiculata</i> | -<br>-<br>-                                                       | KY973016<br>KY973015<br>-                      | KY973206<br>KY973205<br>-                      | KY972819<br>KY972818<br>KP995596                                                                                                             |
| <i>Shorea selanica</i>     | AY026741<br>AY026689<br>-<br>-<br>-<br>-<br>-<br>-<br>-<br>-<br>- | -<br>-<br>-<br>-<br>-<br>-<br>-<br>-<br>-<br>- | -<br>-<br>-<br>-<br>-<br>-<br>-<br>-<br>-<br>- | AY026632<br>AB775786<br>AB775787<br>AB775788<br>AB775789<br>AB775790<br>AB775791<br>AB775792<br>AB775793<br>AB775794<br>AB775795<br>AY026575 |



**Supplementary Data A. (cont.)** Dipterocarpaceae sequences of *matK*, *rbcL*, *trnL* and ITS were retrieved from GenBank (NCBI) with accession number.

|                          |          |          |          |          |
|--------------------------|----------|----------|----------|----------|
| <i>Shorea seminis</i>    | -        | AB246450 | -        | AB452150 |
|                          | -        | -        | -        | AB246580 |
|                          | -        | -        | -        | AY026576 |
|                          | -        | -        | -        | KP995597 |
|                          | -        | -        | -        | AB452358 |
|                          | -        | -        | -        | AB246515 |
|                          | -        | -        | -        | AY026633 |
| <i>Shorea siamensis</i>  | MH410688 | KJ611236 | DQ157295 | DQ157289 |
|                          | MH410664 | AB924794 | KM267141 | DQ157295 |
|                          | MH410663 | AB924864 | AB925479 | -        |
|                          | MH410662 | -        | AB925405 | -        |
|                          | AY026742 | -        | -        | -        |
|                          | AY026690 | -        | -        | -        |
| <i>Shorea singkawang</i> | AY026743 | -        | MN444968 | AB452153 |
|                          | AY026691 | -        | MN444967 | AB452152 |
|                          | -        | -        | MN444966 | AB452151 |
|                          | -        | -        | MN444965 | AY026577 |
|                          | -        | -        | MN444960 | KP995598 |
|                          | -        | -        | MN444954 | AB452360 |
|                          | -        | -        | -        | AB452359 |
|                          | -        | -        | -        | AY026634 |
| <i>Shorea slootenii</i>  | -        | -        | -        | AB452156 |
|                          | -        | -        | -        | AB452155 |
|                          | -        | -        | -        | AB452154 |
|                          | -        | -        | -        | AB452364 |
|                          | -        | -        | -        | AB452363 |
|                          | -        | -        | -        | AB452362 |

**Supplementary Data A. (cont.)** Dipterocarpaceae sequences of *matK*, *rbcL*, *trnL* and ITS were retrieved from GenBank (NCBI) with accession number.

|                         |          |          |          |          |
|-------------------------|----------|----------|----------|----------|
| <i>Shorea smithiana</i> | AY026744 | KY973064 | KY973254 | KY972867 |
|                         | AY026692 | KY973063 | KY973253 | KY972866 |
|                         | -        | AB295902 | -        | AB452165 |
|                         | -        | AB295901 | -        | AB452164 |
|                         | -        | AB295900 | -        | AB452163 |
|                         | -        | AB295899 | -        | AB452162 |
|                         | -        | AB295898 | -        | AB452161 |
|                         | -        | AB295897 | -        | AB452160 |
|                         | -        | -        | -        | AB452159 |
|                         | -        | -        | -        | AB452158 |
|                         | -        | -        | -        | AB452157 |
|                         | -        | -        | -        | AY026578 |
|                         | -        | -        | -        | KP995599 |
|                         | -        | -        | -        | AB452373 |
|                         | -        | -        | -        | AB452372 |
|                         | -        | -        | -        | AB452371 |
|                         | -        | -        | -        | AB452370 |
|                         | -        | -        | -        | AB452369 |
|                         | -        | -        | -        | AB452368 |
|                         | -        | -        | -        | AB452367 |
|                         | -        | -        | -        | AB452366 |
|                         | -        | -        | -        | AB452365 |
|                         | -        | -        | -        | AY026635 |
| <i>Shorea splendens</i> | -        | AB246443 | -        | AB246573 |
|                         | -        | -        | -        | AB246508 |
| <i>Shorea splendida</i> | AY026745 | -        | -        | AB452167 |
|                         | AY026693 | -        | -        | AB452166 |
|                         | -        | -        | -        | AY026579 |
|                         | -        | -        | -        | KP995600 |
|                         | -        | -        | -        | AB452375 |
|                         | -        | -        | -        | AB452374 |
|                         | -        | -        | -        | AY026636 |

**Supplementary Data A. (cont.)** Dipterocarpaceae sequences of *matK*, *rbcL*, *trnL* and ITS were retrieved from GenBank (NCBI) with accession number.

|                          |   |          |   |          |
|--------------------------|---|----------|---|----------|
| <i>Shorea stenoptera</i> | - | -        | - | AB452173 |
|                          | - | -        | - | AB452172 |
|                          | - | -        | - | AB452171 |
|                          | - | -        | - | AB452170 |
|                          | - | -        | - | AB452169 |
|                          | - | -        | - | AB452168 |
|                          | - | -        | - | AY026580 |
|                          | - | -        | - | KP995601 |
|                          | - | -        | - | AB452381 |
|                          | - | -        | - | AB452380 |
|                          | - | -        | - | AB452379 |
|                          | - | -        | - | AB452378 |
|                          | - | -        | - | AB452377 |
|                          | - | -        | - | AB452376 |
| <i>Shorea stipularis</i> | - | AB246454 | - | AB246584 |
|                          | - | -        | - | AB246519 |
| <i>Shorea sumatrana</i>  | - | -        | - | AB452176 |
|                          | - | -        | - | AB452175 |
|                          | - | -        | - | AB452174 |
|                          | - | -        | - | KP995602 |
|                          | - | -        | - | AB452384 |
|                          | - | -        | - | AB452383 |
| <i>Shorea superba</i>    | - | -        | - | AB452382 |
|                          | - | -        | - | AB452179 |
|                          | - | -        | - | AB452178 |
|                          | - | -        | - | AB452177 |
|                          | - | -        | - | KP995603 |
|                          | - | -        | - | AB452387 |
|                          | - | -        | - | AB452386 |
|                          | - | -        | - | AB452385 |

**Supplementary Data A. (cont.)** Dipterocarpaceae sequences of *matK*, *rbcL*, *trnL* and ITS were retrieved from GenBank (NCBI) with accession number.

|                                   |                                   |                                          |                                           |                                                                                  |
|-----------------------------------|-----------------------------------|------------------------------------------|-------------------------------------------|----------------------------------------------------------------------------------|
| <i>Shorea symingtonii</i>         | -<br>-                            | -<br>-                                   | -<br>-                                    | AB452180<br>AB452388                                                             |
| <i>Shorea talura</i>              | -                                 | -                                        | AJ247623                                  | -                                                                                |
| <i>Shorea teysmanniana</i>        | -<br>-                            | -<br>-                                   | -<br>-                                    | AB452181<br>AB452389                                                             |
| <i>Shorea thorelii</i>            | -                                 | -                                        | DQ157294                                  | DQ157288                                                                         |
| <i>Shorea trapezifolia</i>        | -<br>-                            | AB246466<br>-                            | -<br>-                                    | AB246596<br>AB246531                                                             |
| <i>Shorea tumbugaia</i>           | -                                 | -                                        | KF432036                                  | -                                                                                |
| <i>Shorea virescens</i>           | AY026694<br>-<br>-<br>-<br>-<br>- | KY973018<br>KY973017<br>-<br>-<br>-<br>- | NC_040965<br>MH841939<br>-<br>-<br>-<br>- | KY972821<br>KY972820<br>AB452184<br>AB452183<br>AY026581<br>AB452392<br>AB452391 |
| <i>Shorea worthingtonii</i>       | -<br>-                            | AB246469<br>-                            | -<br>-                                    | AB246599<br>AB246534                                                             |
| <i>Shorea xanthophylla</i>        | -<br>-<br>-<br>-<br>-             | AB246452<br>-<br>-<br>-<br>-             | -<br>-<br>-<br>-<br>-                     | AB452186<br>AB246582<br>KP995604<br>AB452394<br>AB246517                         |
| <i>Shorea zeylanica</i>           | -<br>-<br>-                       | AB246470<br>NC_040965<br>MH841939        | -<br>-<br>-                               | AB246600<br>AB246535<br>-                                                        |
| <i>Stemonoporus acuminatus</i>    | -<br>-                            | AB246422<br>-                            | -<br>-                                    | AB246487<br>AB246487                                                             |
| <i>Stemonoporus bullatus</i>      | -<br>-                            | AB246426<br>-                            | -<br>-                                    | AB246491<br>HM231204                                                             |
| <i>Stemonoporus canaliculatus</i> | -<br>-                            | AB246425<br>-                            | -<br>-                                    | AB246555<br>AB246490                                                             |

**Supplementary Data A. (cont.)** Dipterocarpaceae sequences of *matK*, *rbcL*, *trnL* and ITS were retrieved from GenBank (NCBI) with accession number.

|                                   |                       |                                             |                           |                                                          |
|-----------------------------------|-----------------------|---------------------------------------------|---------------------------|----------------------------------------------------------|
| <i>Stemonoporus elegans</i>       | -<br>-                | KY973068<br>KY973067                        | KY973258<br>KY973257      | KY972871<br>KY972870                                     |
| <i>Stemonoporus gilimalensis</i>  | -<br>-                | AB246423<br>-                               | -<br>-                    | AB246553<br>AB246488                                     |
| <i>Stemonoporus kanneliyensis</i> | -<br>-                | AB246429<br>-                               | -<br>-                    | AB246559<br>AB246494                                     |
| <i>Stemonoporus lancifolius</i>   | -<br>-                | AB246430<br>-                               | -<br>-                    | AB246560<br>AB246495                                     |
| <i>Stemonoporus reticulatus</i>   | -<br>-                | AB246427<br>-                               | -<br>-                    | AB246557<br>AB246492                                     |
| <i>Stemonoporus scalarinervis</i> | -<br>-                | AB246424<br>-                               | -<br>-                    | AB246554<br>AB246489                                     |
| <i>Stemonoporus wightii</i>       | -<br>-                | AB246428<br>-                               | -<br>-                    | AB246558<br>AB246493                                     |
| <i>Upuna borneensis</i>           | -<br>-<br>-<br>-      | AB006374<br>-<br>-<br>-                     | EF660033<br>-<br>-<br>-   | AB006391<br>KP995605<br>EF660014<br>AB006408             |
| <i>Vateria copallifera</i>        | -<br>-<br>-           | AB246431<br>KU687000<br>KY973069 - KY973070 | KY973260<br>KY973259<br>- | KY972872 - KY972873<br>AB246561<br>AB246496              |
| <i>Vateriopsis seychellarum</i>   | -<br>-                | AB246432<br>-                               | -<br>-                    | AB246562<br>AB246497                                     |
| <i>Vatica affinis</i>             | -<br>-                | AB246421<br>-                               | -<br>-                    | AB246551<br>AB246486                                     |
| <i>Vatica bella</i>               | -<br>-<br>-<br>-<br>- | AB246416<br>-<br>-<br>-<br>-                | -<br>-<br>-<br>-<br>-     | AB452182<br>AB246546<br>KP995606<br>AB452390<br>AB246481 |
| <i>Vatica chevalieri</i>          | -                     | KJ611243                                    | KM267153                  | -                                                        |

**Supplementary Data A. (cont.)** Dipterocarpaceae sequences of *matK*, *rbcL*, *trnL* and ITS were retrieved from GenBank (NCBI) with accession number.

|                            |                                     |                                                    |                                                                      |                                                         |
|----------------------------|-------------------------------------|----------------------------------------------------|----------------------------------------------------------------------|---------------------------------------------------------|
| <i>Vatica chinensis</i>    | -<br>-<br>-                         | KY973074<br>KY973073<br>AB246420                   | KY973264<br>KY973263<br>-                                            | KY972876 - KY972877<br>AB246550<br>AB246485             |
| <i>Vatica coriacea</i>     | -<br>-<br>-                         | KY973076<br>KY973075<br>AB246418                   | KY973266<br>KY973265<br>-                                            | KY972878 - KY972879<br>AB246548<br>AB246483             |
| <i>Vatica diospyroides</i> | MK051075<br>MK051074<br>-<br>-      | KY973077<br>MK051092<br>MK051091<br>-              | DQ157305<br>KY973267<br>MK030573<br>MK030572                         | KY972880<br>MK193023<br>MK051064<br>DQ157290            |
| <i>Vatica dulitensis</i>   | -                                   | KY973079 - KY973080                                | KY973269 - KY973270                                                  | KY972882 - KY972883                                     |
| <i>Vatica endertii</i>     | -                                   | KY973071 - KY973072                                | KY973261 - KY973262                                                  | KY972874 - KY972875                                     |
| <i>Vatica flavida</i>      | -                                   | -                                                  | -                                                                    | KP995607                                                |
| <i>Vatica guangxiensis</i> | MK051077<br>MK051076<br>-           | MK051093 - MK051094<br>NC_051531<br>MT934442       | NC_051531<br>MT934442<br>MK030574 - MK030575                         | MK051066<br>MK051065<br>-                               |
| <i>Vatica harmandiana</i>  | -                                   | KY973078                                           | KY973268                                                             | KY972881                                                |
| <i>Vatica maingayi</i>     | -<br>-                              | KJ709130<br>-                                      | KJ594927<br>MN445008                                                 | -<br>-                                                  |
| <i>Vatica mangachapoi</i>  | MK193027<br>AY328171<br>-<br>-<br>- | MK051096<br>MK051095<br>NC_041485<br>MH716496<br>- | AY328199<br>KP769000<br>MK030576 - MK030577<br>NC_041485<br>MH716496 | AY328168<br>MK051068<br>MK051067<br>-<br>-              |
| <i>Vatica micrantha</i>    | -<br>-<br>-                         | KY973084<br>KY973083<br>AB246419                   | KY973274<br>KY973273<br>-                                            | KY972886 - KY972887<br>AB246549<br>AB246484             |
| <i>Vatica nitens</i>       | -                                   | -                                                  | -                                                                    | KP995608                                                |
| <i>Vatica oblongifolia</i> | -<br>-<br>-<br>-                    | -<br>-<br>-<br>-                                   | KY973277<br>KY973279<br>KY973278<br>-                                | AB452185<br>KY972892<br>KY972890 - KY972891<br>AB452393 |

**Supplementary Data A. (cont.)** Dipterocarpaceae sequences of *matK*, *rbcL*, *trnL* and ITS were retrieved from GenBank (NCBI) with accession number.

|                            |                                      |                                                                                              |                                                                         |                                                                  |
|----------------------------|--------------------------------------|----------------------------------------------------------------------------------------------|-------------------------------------------------------------------------|------------------------------------------------------------------|
| <i>Vatica odorata</i>      | -<br>-<br>-<br>-<br>-<br>-<br>-<br>- | AB006373<br>KJ709131<br>KF021567<br>AB924768<br>KX966283<br>MN533976<br>AB924681<br>KY973090 | DQ157304<br>AB925379<br>AB925288<br>MN533976<br>KY973280<br>-<br>-<br>- | AB006390<br>KP995609<br>KY972893<br>AB006407<br>-<br>-<br>-<br>- |
| <i>Vatica papuana</i> (4)  | -<br>-<br>-<br>-                     | -<br>-<br>-<br>-                                                                             | JF738706<br>JF738615<br>JF738608<br>JF738601                            | -<br>-<br>-<br>-                                                 |
| <i>Vatica pauciflora</i>   | -<br>-<br>-                          | AB246417<br>-<br>-                                                                           | -<br>-<br>-                                                             | AB246547<br>KP995610<br>AB246482                                 |
| <i>Vatica ridleyana</i>    | -<br>-                               | KJ709132<br>-                                                                                | KJ594929<br>KJ594928 - KJ594930                                         | -<br>-                                                           |
| <i>Vatica sarawakensis</i> | -<br>-                               | KY973091<br>KY973092                                                                         | KY973282<br>KY973281                                                    | KY972895<br>KY972894                                             |
| <i>Vatica stapfiana</i>    | -                                    | -                                                                                            | LC415117                                                                | -                                                                |
| <i>Vatica vinosa</i>       | -<br>-                               | KY973093<br>KY973094                                                                         | KY973284<br>KY973283                                                    | KY972897<br>KY972896                                             |
| <i>Vatica yeechongii</i>   | -                                    | -                                                                                            | -                                                                       | KP995611                                                         |

**Supplementary Data B.** Melting profiles obtaining from the uMelt Quartz program. The sequences of five Fagaceae species were trimmed to leave only the region that would generated by each pair of the candidate primers (M3, G3, P3, PB4 and PQ1). The amplicons were then put into the program to get the melting profiles of each species.

**Primer: M3**

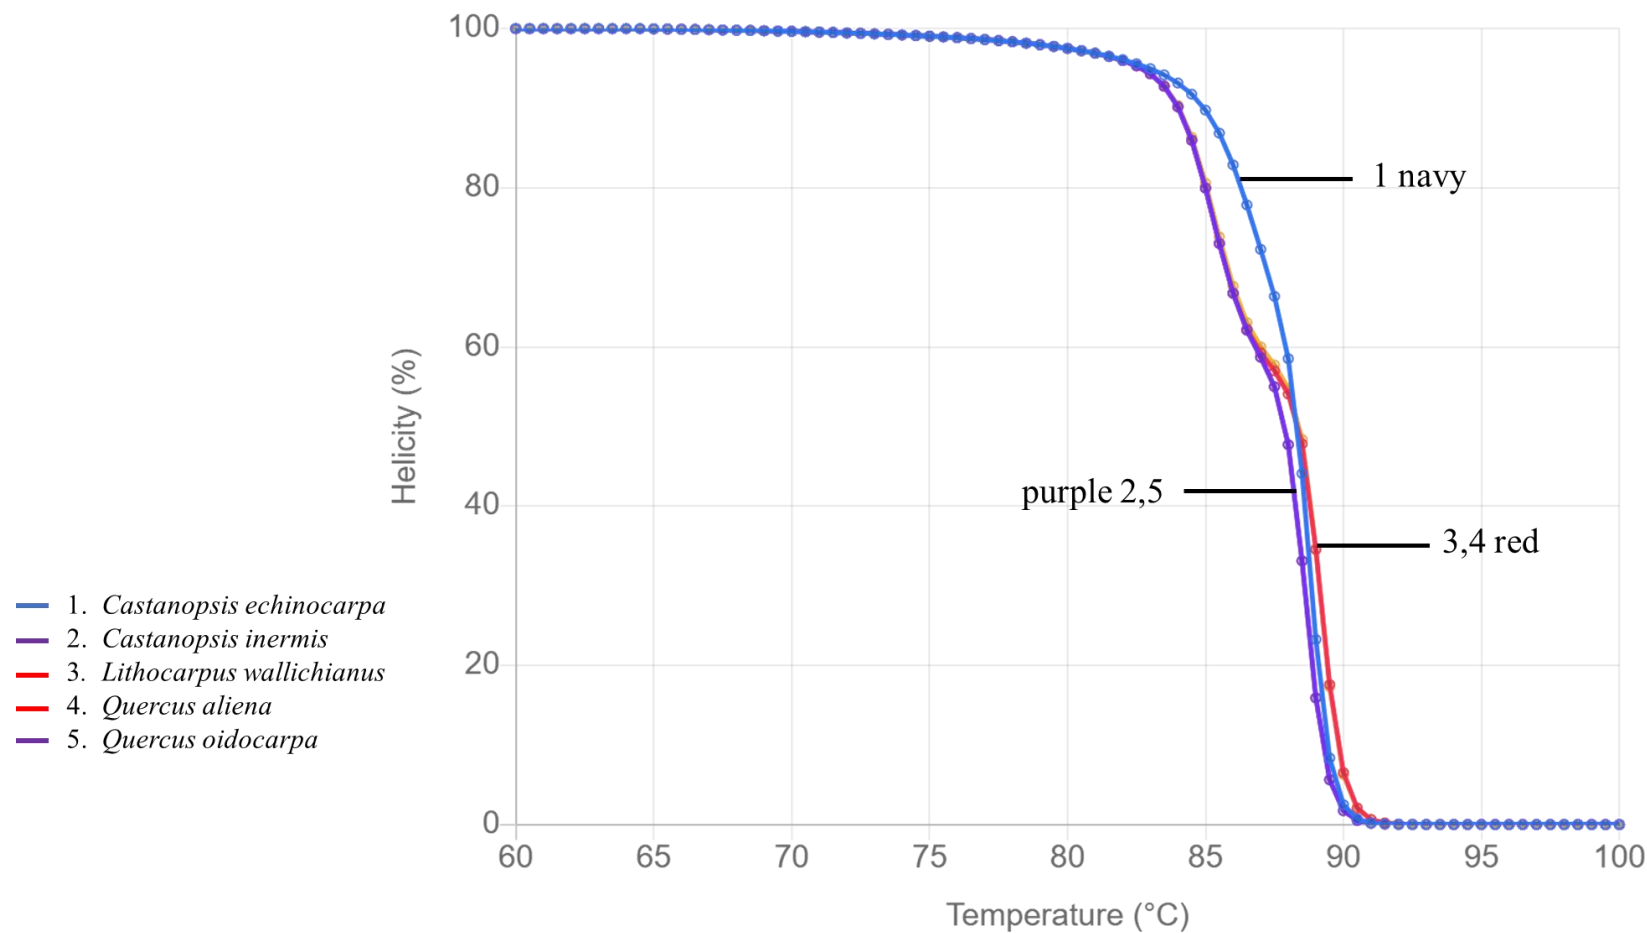



**Supplementary Data B. (cont.)** Melting profiles obtaining from the uMelt Quartz program. The sequences of five Fagaceae species were trimmed to leave only the region that would generated by each pair of the candidate primers (M3, G3, P3, PB4 and PQ1). The amplicons were then put into the program to get the melting profiles of each species.

**Primer: G3**

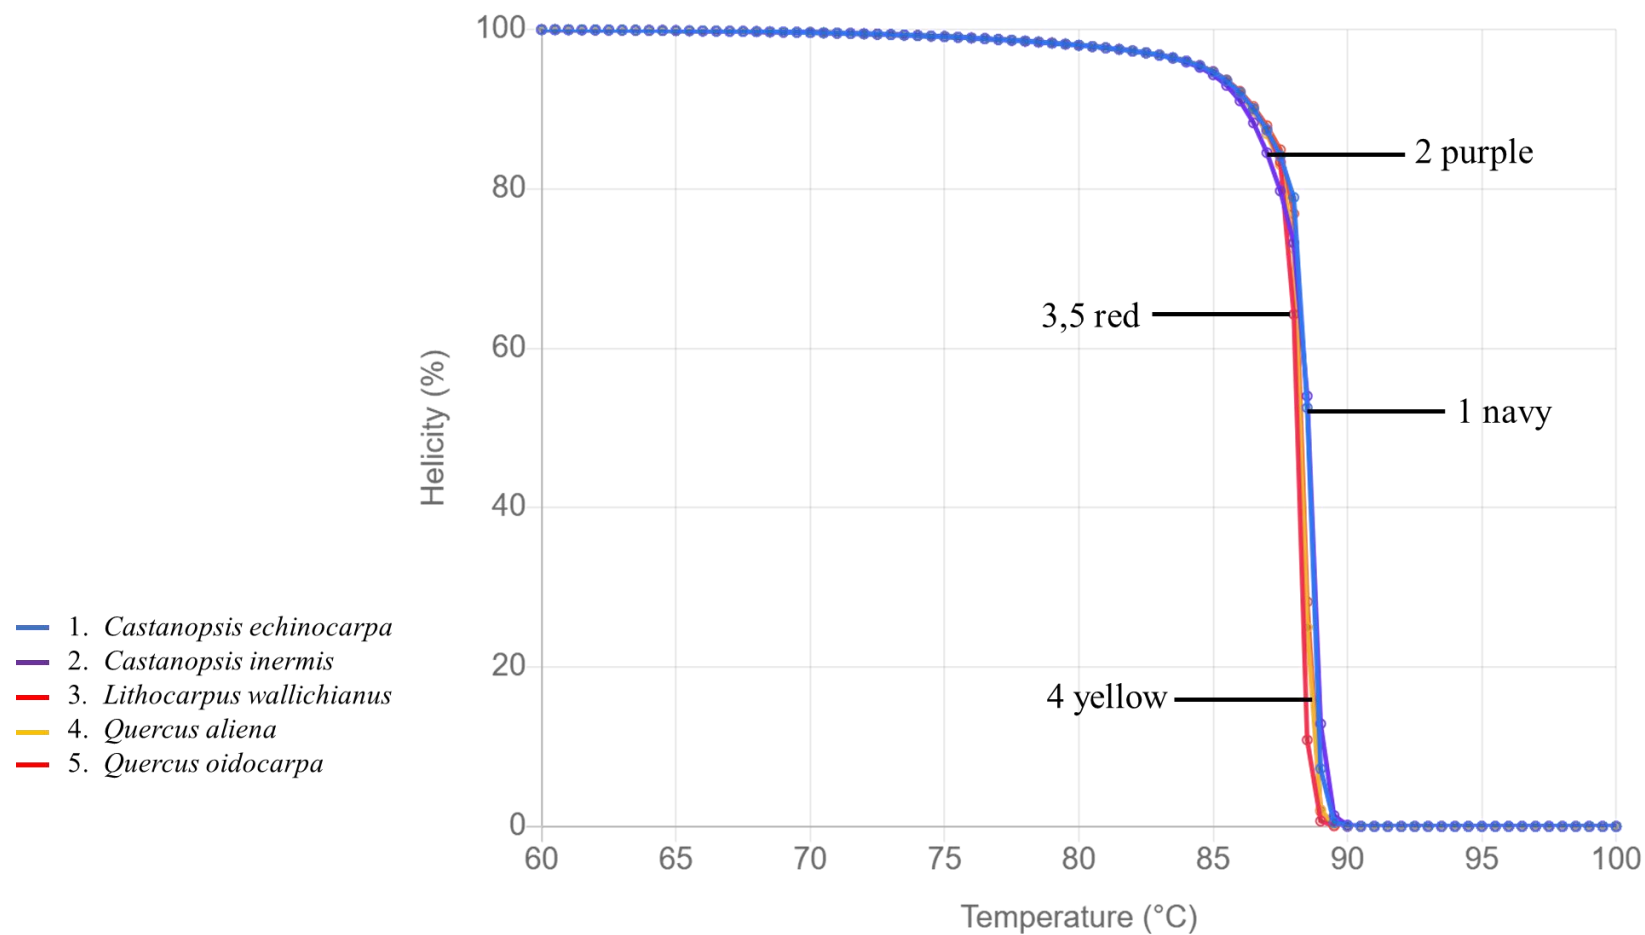

**Supplementary Data B. (cont.)** Melting profiles obtaining from the uMelt Quartz program. The sequences of five Fagaceae species were trimmed to leave only the region that would generated by each pair of the candidate primers (M3, G3, P3, PB4 and PQ1). The amplicons were then put into the program to get the melting profiles of each species.

**Primer: P3**

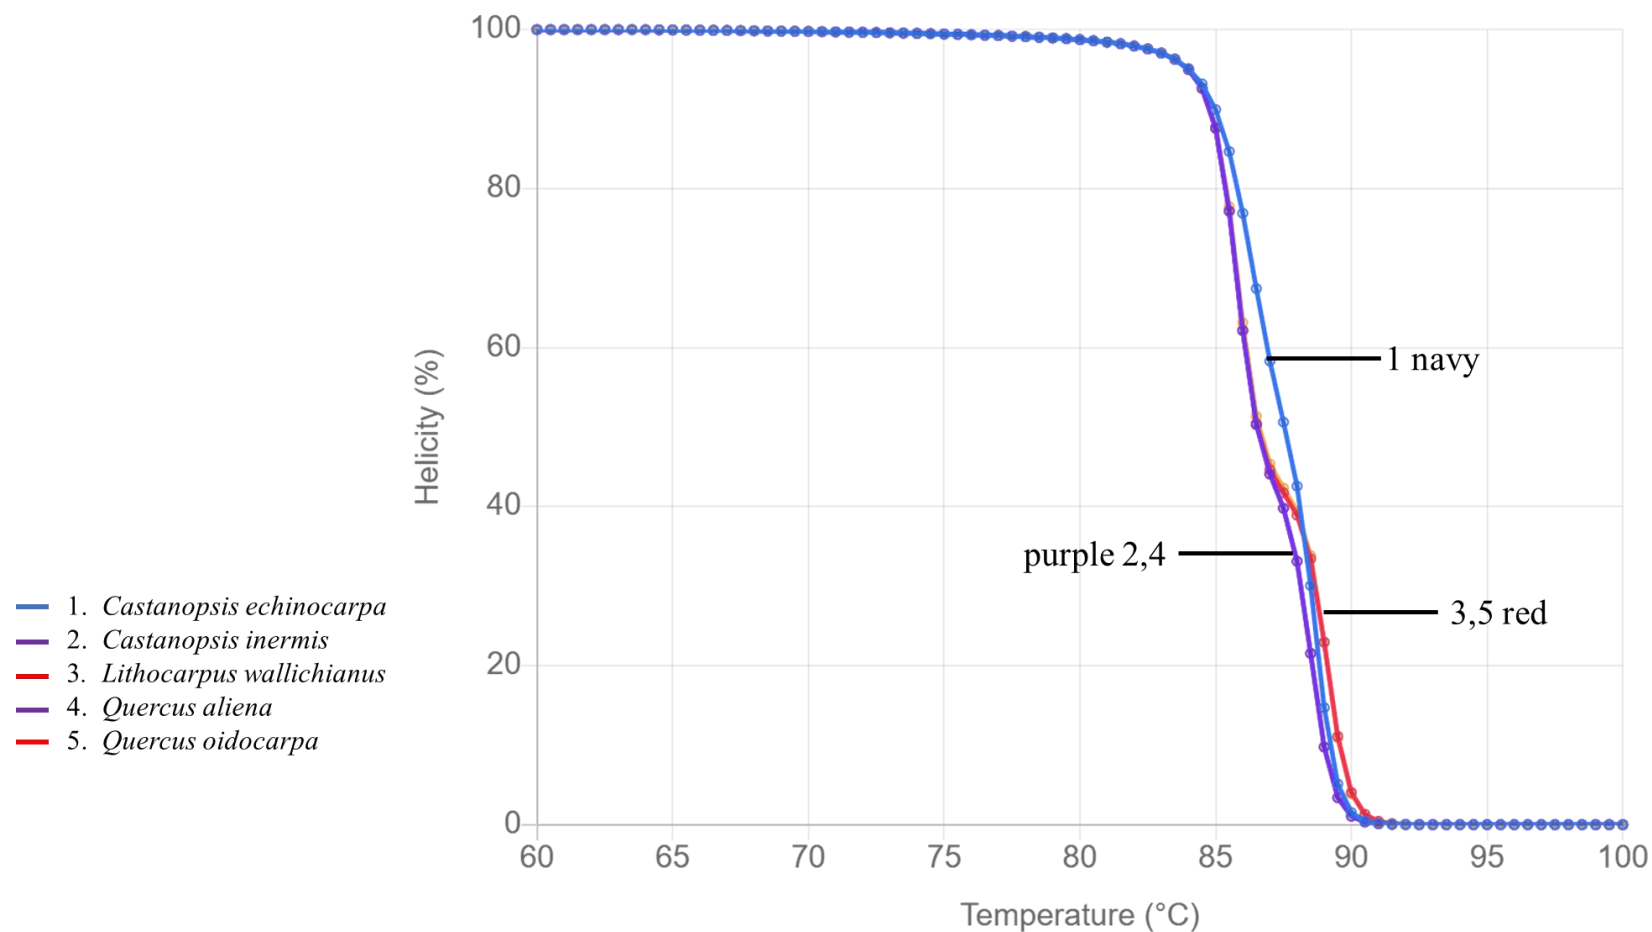

**Supplementary Data B. (cont.)** Melting profiles obtaining from the uMelt Quartz program. The sequences of five Fagaceae species were trimmed to leave only the region that would generated by each pair of the candidate primers (M3, G3, P3, PB4 and PQ1). The amplicons were then put into the program to get the melting profiles of each species.

**Primer: PB4**

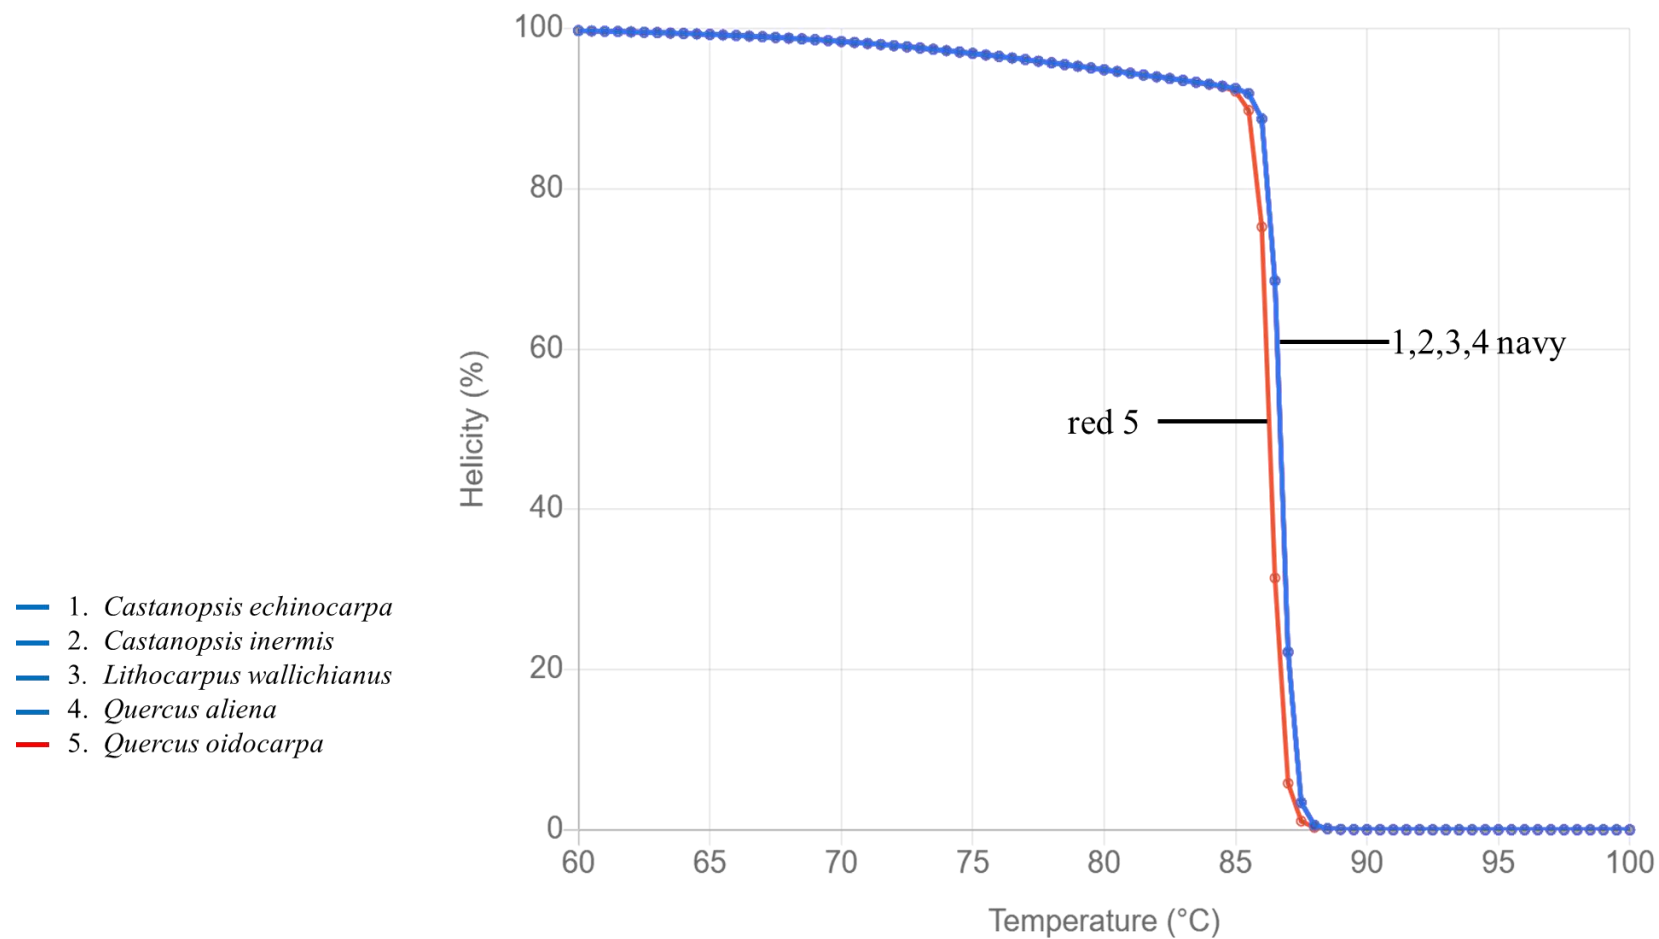

**Supplementary Data B. (cont.)** Melting profiles obtaining from the uMelt Quartz program. The sequences of five Fagaceae species were trimmed to leave only the region that would generated by each pair of the candidate primers (M3, G3, P3, PB4 and PQ1). The amplicons were then put into the program to get the melting profiles of each species.

**Primer: PQ1**

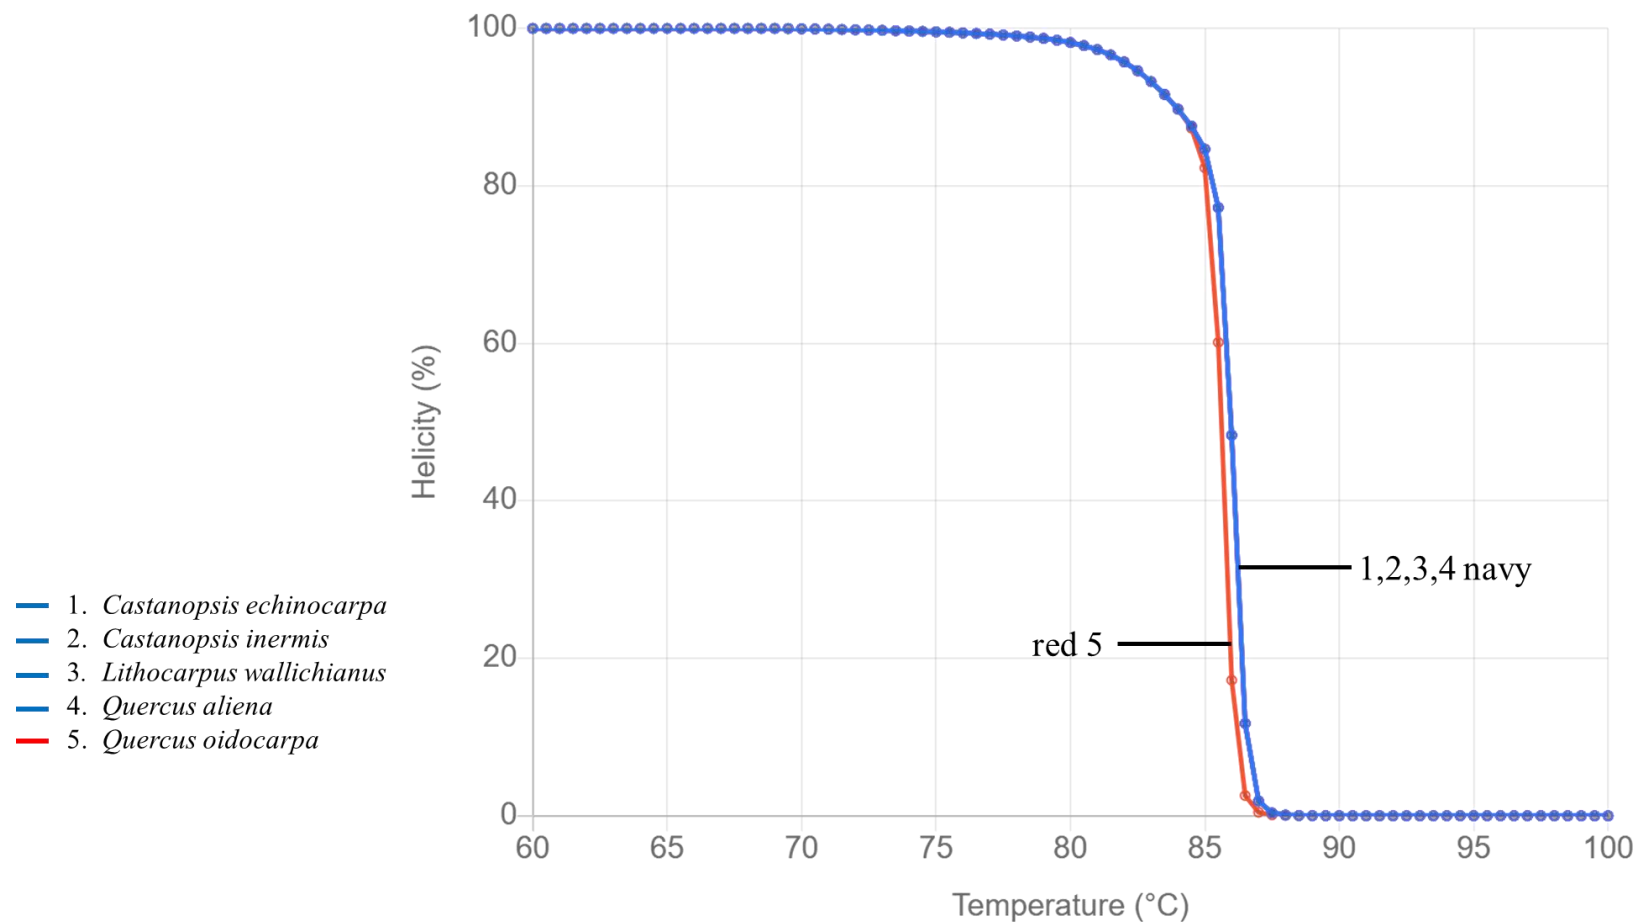

Supplement: s1 [file s1]
